# Supplementary material for: In depth analysis of heterogeneous catalysts for the chemoenzymatic dynamic kinetic resolution of β-amino esters
Source: Royal Society of Chemistry journal article supplement (doi:10.1039/d1cy02329b), 2022-01-01
Supplement: d1cy02329b1.pdf [file d1cy02329b1.pdf]

**In depth analysis of heterogeneous catalysts for the chemoenzymatic  
dynamic kinetic resolution of beta-amino esters.**

Koen Adriaensen, Jannick Verammen, Cédric Van Goethem, Kumar Varoon Agrawal, Dirk De Vos

**Supplementary information**

## Table of contents

|     |                                                       |    |
|-----|-------------------------------------------------------|----|
| 1.0 | Additional racemization data and figures.....         | 3  |
| 2.0 | Reaction scheme of the kinetic resolution .....       | 4  |
| 3.0 | Derivation of kinetic equations.....                  | 5  |
| 4.0 | Additional TEM images and particle distribution. .... | 6  |
| 5.0 | N <sub>2</sub> physisorption isotherms .....          | 9  |
| 6.0 | Amino ester characterization .....                    | 11 |

## 1.0 Additional racemization data and figures

Figure 1: Racemization of beta-phenylalanine propyl ester with Pd/AlO(OH) (1 wt%) at various conditions. General reaction conditions: 72.5 mM substrate, 5 mol% catalyst, toluene,  $p(H_2) = 0.50$  bar,  $p(\text{total}) = 5.0$  bar ( $N_2$ ), 70 °C, 24 h.

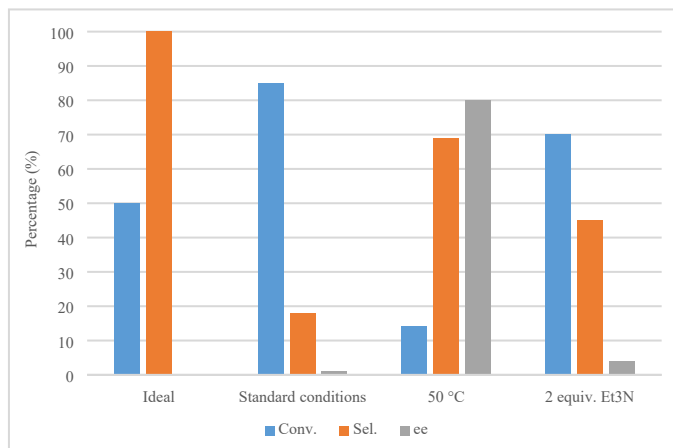

Table 1: Influence of base on the racemization of R-beta-phenylalanine propyl ester. General reaction conditions: 72.5 mM substrate, 5 mol% catalyst, toluene,  $p(H_2) = 0.50$  bar,  $p(\text{total}) = 5.0$  bar ( $N_2$ ), 70 °C, 24 h. 2 equivalents of Et<sub>3</sub>N with respect to the substrate were added. <sup>1</sup>: 5 equivalents instead of 2.

| Entry | Catalyst                   | Additive                                    | Conv. (%) | Sel. (%)  | ee <sub>R</sub> (%) |
|-------|----------------------------|---------------------------------------------|-----------|-----------|---------------------|
| 1     | Pd/CaCO <sub>3</sub>       |                                             | 59        | 70        | 1                   |
| 2     | Pd/CaCO <sub>3</sub>       | CS <sub>2</sub> CO <sub>3</sub>             | 0         | > 99      | > 99                |
| 3     | Pd/CaCO <sub>3</sub>       | K <sub>2</sub> CO <sub>3</sub> <sup>1</sup> | 15        | > 99      | 70                  |
| 4     | Pd/CaCO <sub>3</sub>       | KOH <sup>1</sup>                            | 53        | 72        | 11                  |
| 5     | <b>Pd/CaCO<sub>3</sub></b> | <b>Et<sub>3</sub>N</b>                      | <b>52</b> | <b>88</b> | <b>3</b>            |

## 2.0 Reaction scheme of the kinetic resolution

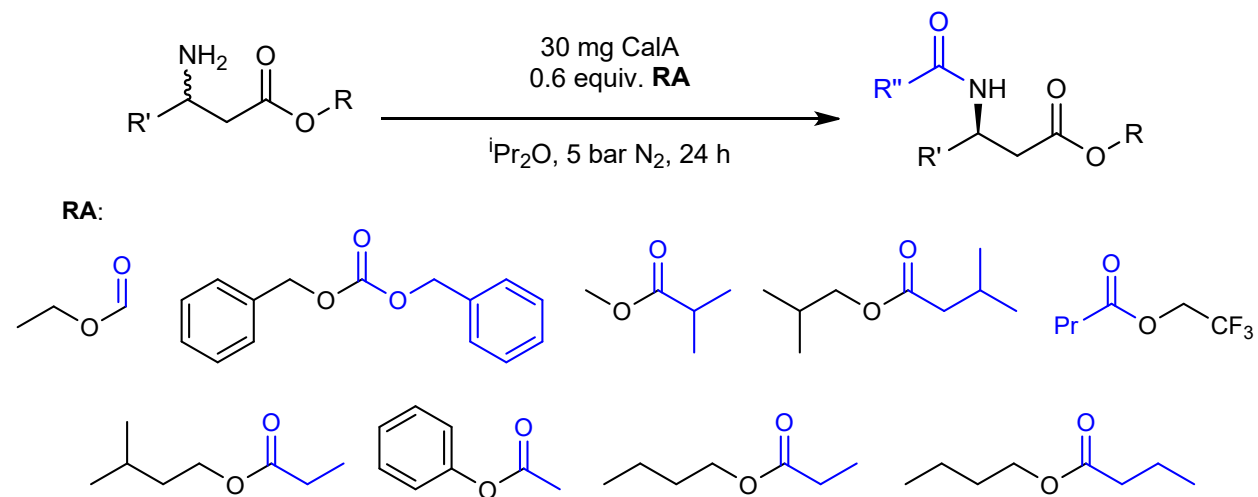

### 3.0 Derivation of kinetic equations

$$\frac{d[R]}{dt} = -k_1[R] + k_{-1}[imine] \quad (1)$$

$$\frac{d[S]}{dt} = -k_1[S] + k_{-1}[imine] \quad (2)$$

$$\frac{d[imine]}{dt} = -2k_{-1}[imine] + k_1([R] + [S]) \quad (3)$$

$$[R]_0 = [R] + [S] + [imine] \quad (4)$$

Assume equilibrium has been established so that  $\frac{d[imine]}{dt} = 0$ ; this allows us to derive (3) to yield (5):

$$[imine] = \frac{k_1}{2k_{-1}}([R] + [S]) \quad (5)$$

$$[imine] = \frac{k_1}{2k_{-1}}([R]_0 - [imine]) \quad \text{substitute (4) into (5)} \quad (6)$$

$$[imine] = \frac{k_1}{k_1 + 2k_{-1}}[R]_0 \quad (7)$$

Enter (7) into (1) to yield:

$$\frac{d[R]}{dt} = -k_1[R] + \frac{k_1 k_{-1}}{k_1 + 2k_{-1}}[R]_0 \quad (8)$$

$$[R] = ce^{-k_1 t} + \frac{k_{-1}}{k_1 + 2k_{-1}}[R]_0 \quad \text{solve differential equation} \quad (9)$$

at  $t = 0$ ,  $[R] = [R]_0$ ; thus:

$$c = \frac{k_1 + k_{-1}}{k_1 + 2k_{-1}}[R]_0 \quad (10)$$

$$[R] = [R]_0 \frac{(k_{-1} + (k_1 + k_{-1})(e^{-k_1 t}))}{(k_1 + 2k_{-1})} \quad \text{enter (10) into (9)} \quad (11)$$

Correct for side reaction by introducing ( $e^{-k_2 t}$ ):

$$[R] = [R]_0 \frac{(k_{-1} + (k_1 + k_{-1})(e^{-k_1 t}))}{(k_1 + 2k_{-1})} (e^{-k_2 t})$$

(12)

## 4.0 Additional TEM images and particle distribution.

*Pd/CaCO<sub>3</sub>*

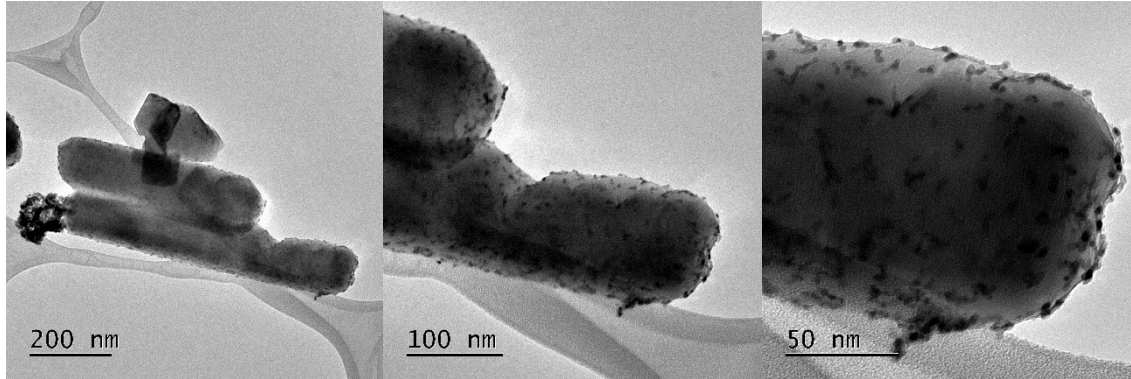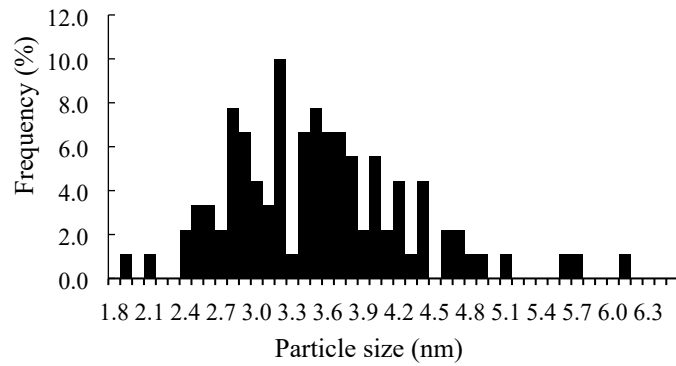

Median: 3.46 nm

Mean: 3.48 nm

Std deviation: 0.76

$Pd(OH)_2/C$

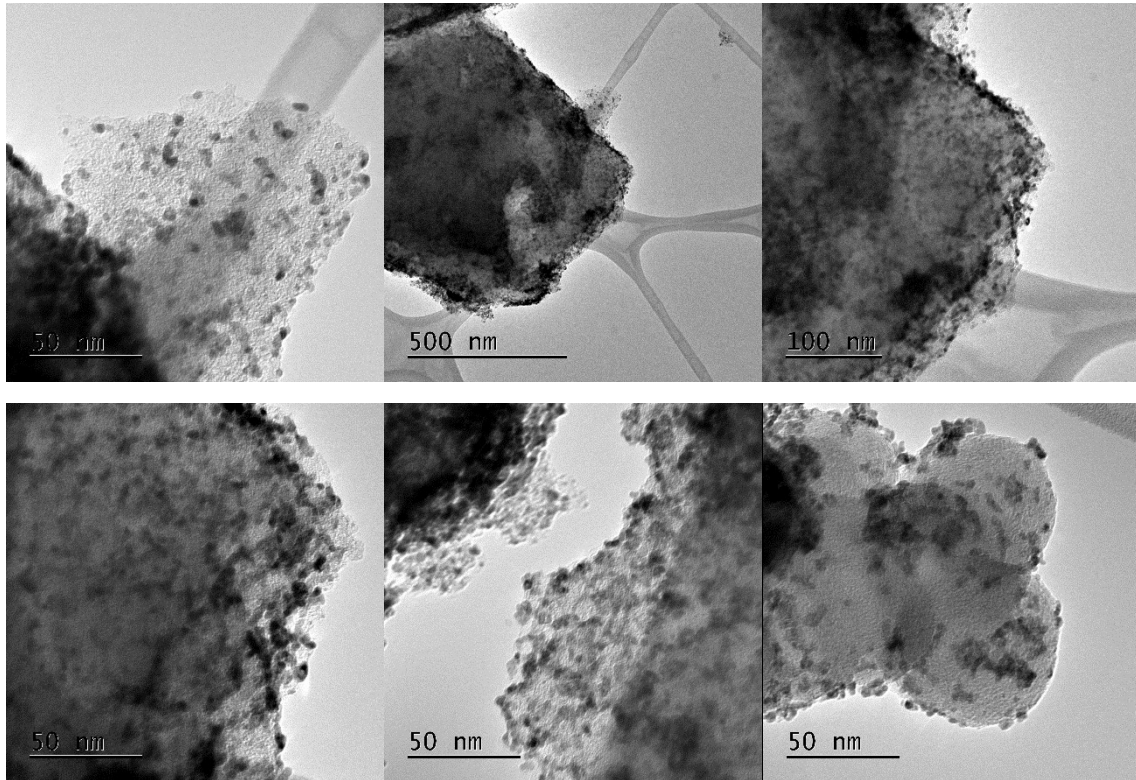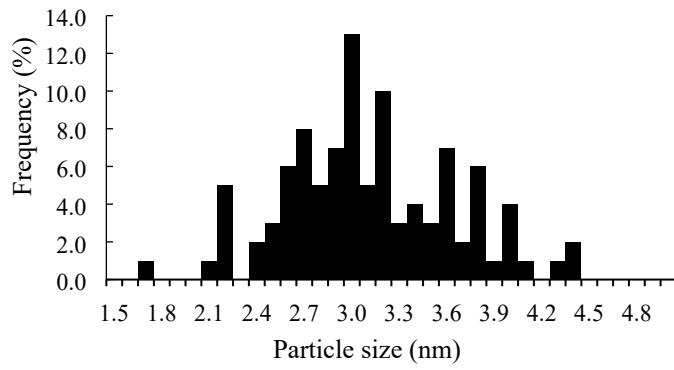

Median: 2.99 nm

Mean: 3.10 nm

Std deviation: 0.64



*Pd/AIO(OH)*

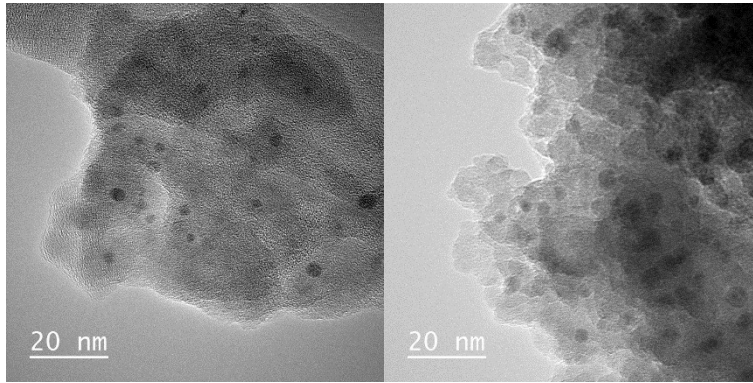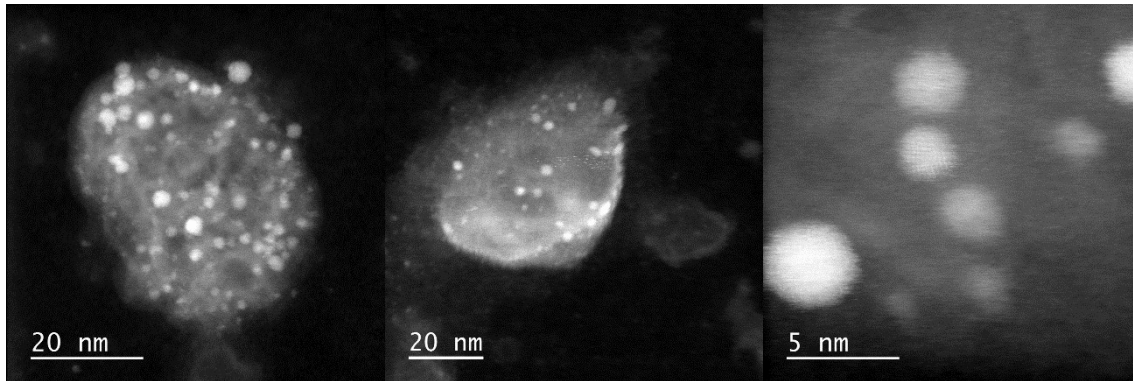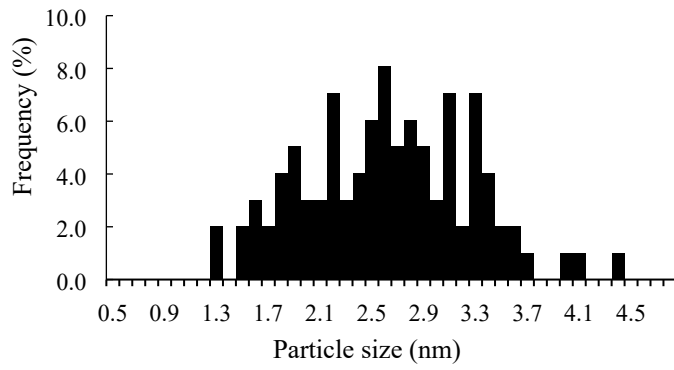

Median: 2.58 nm

Mean: 2.57 nm

Std deviation: 0.64

## 5.0 N<sub>2</sub> physisorption isotherms

*Pd/CaCO<sub>3</sub>*

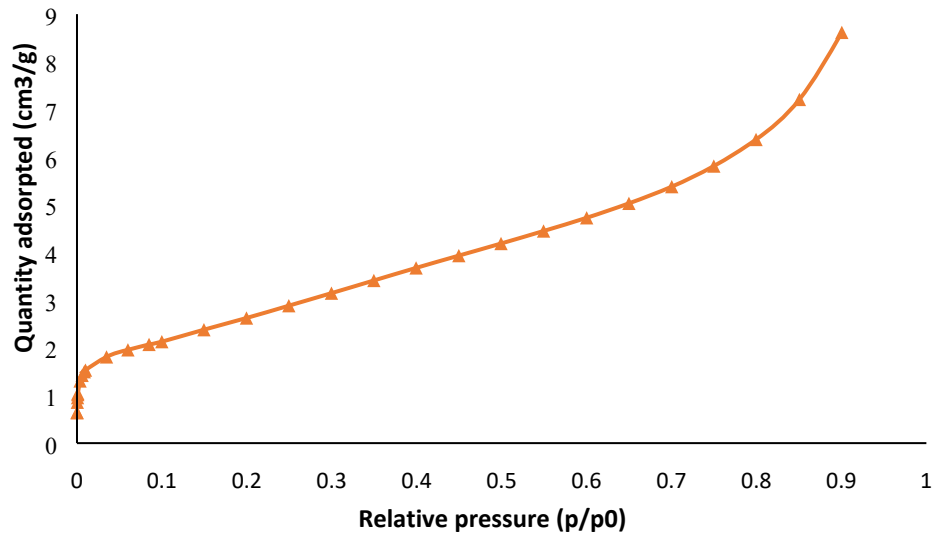

*Pd(OH)<sub>2</sub>/C*

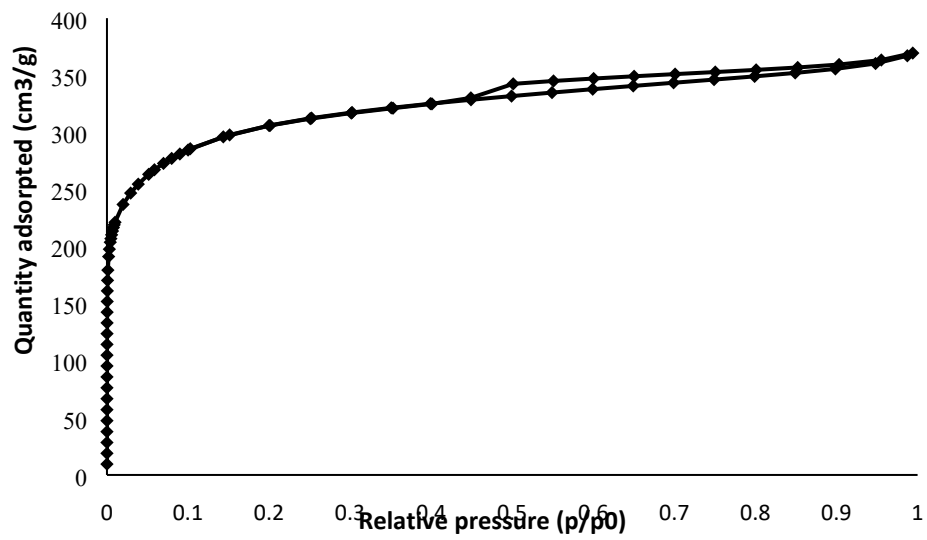

Pd/AlO(OH)

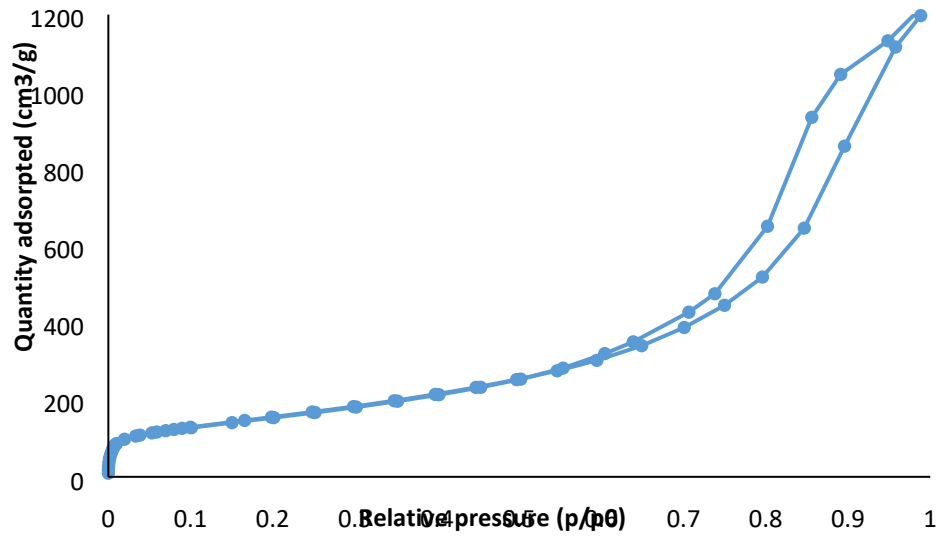

## 6.0 Amino ester characterization

### 6.1 Synthesis of $\beta$ -amino acids

#### 3-amino-3-(4'-chlorophenyl)propionic acid (199.63 g/mol)

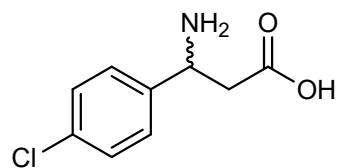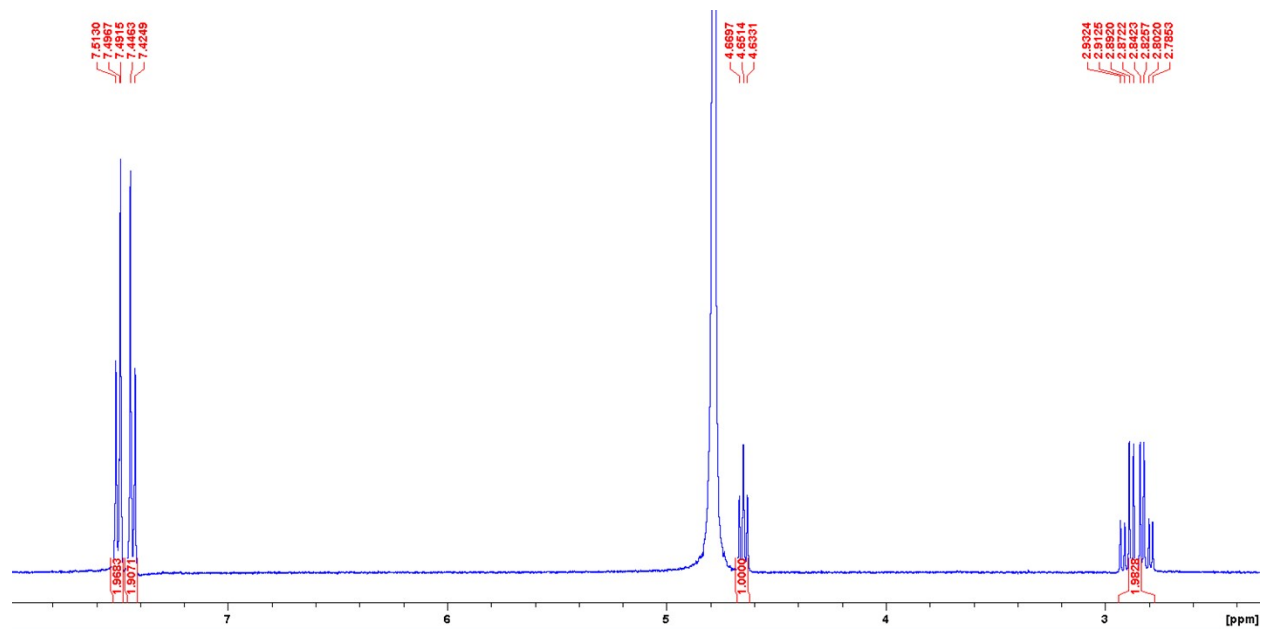

<sup>1</sup>H NMR (300 MHz; D<sub>2</sub>O):  $\delta_{\text{H}}$  2.77-2.95 (2 H, m (2 x dd)), 4.65 (1 H, m (dd)), 7.41-7.53 (4 H, m).

**3-amino-3-(4'-nitrophenyl)propionic acid (210.19 g/mol)**

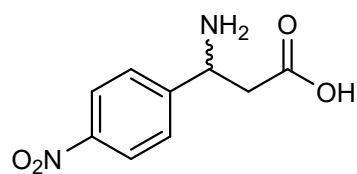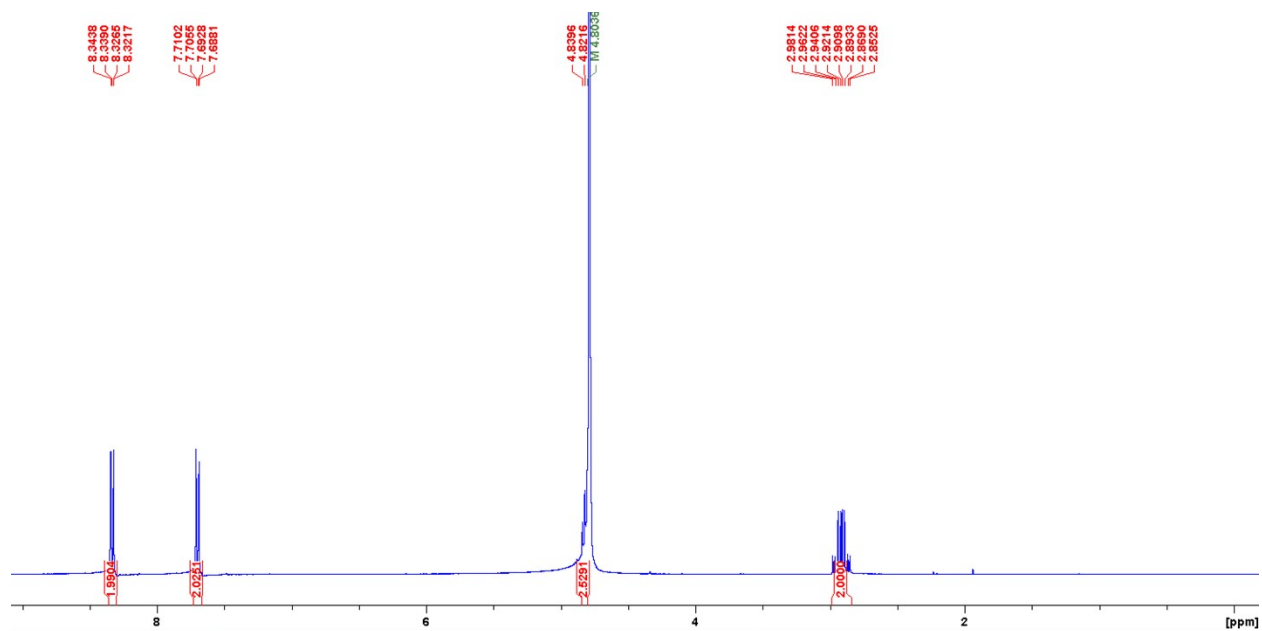

**<sup>1</sup>H NMR** (300 MHz; D<sub>2</sub>O): δ<sub>H</sub> 2.82-2.99 (2 H, m (2 x dd)), 7.69 (2 H, d), 8.31 (2 H, d). (Ph-CH(NH<sub>2</sub>)-CH<sub>2</sub>-COOH signal probably underneath H<sub>2</sub>O signal)

**3-amino-3-cyclohexanepropionic acid (171.24 g/mol)**

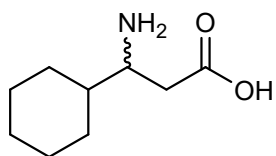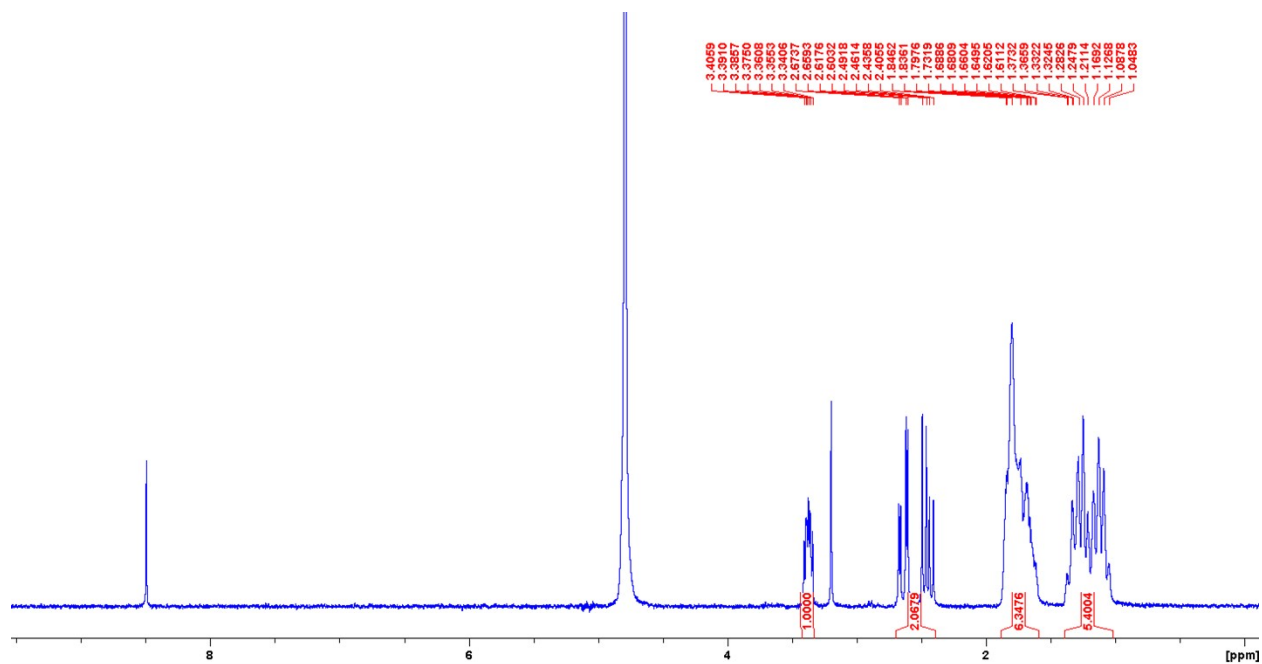

**<sup>1</sup>H NMR** (300 MHz; D<sub>2</sub>O):  $\delta_{\text{H}}$  1.04-1.40 (5 H, m), 1.60-1.88 (6 H, m), 2.39-2.70 (2 H, m (2 x dd)), 3.32-3.43 (1 H, m (dd)).

## 6.2 Synthesis of $\beta$ -amino esters

A notation of "CH" and "Cq" is used in the description of  $^{13}\text{C}$ -NMR signals to denote protonated carbons ( $\text{CH}$ ,  $\text{CH}_2$  or  $\text{CH}_3$ ) and quaternary carbons, respectively.

### propyl 3-aminobenzeneproanoate (207.27 g/mol)

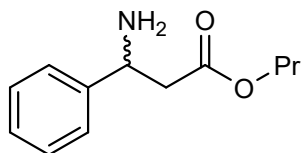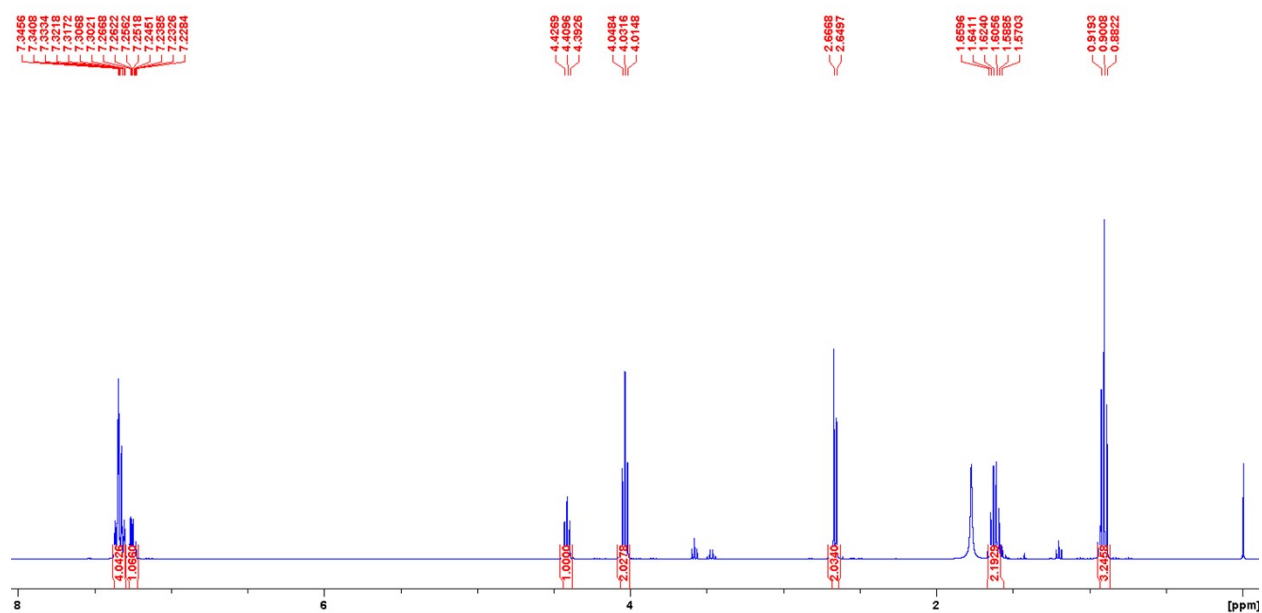

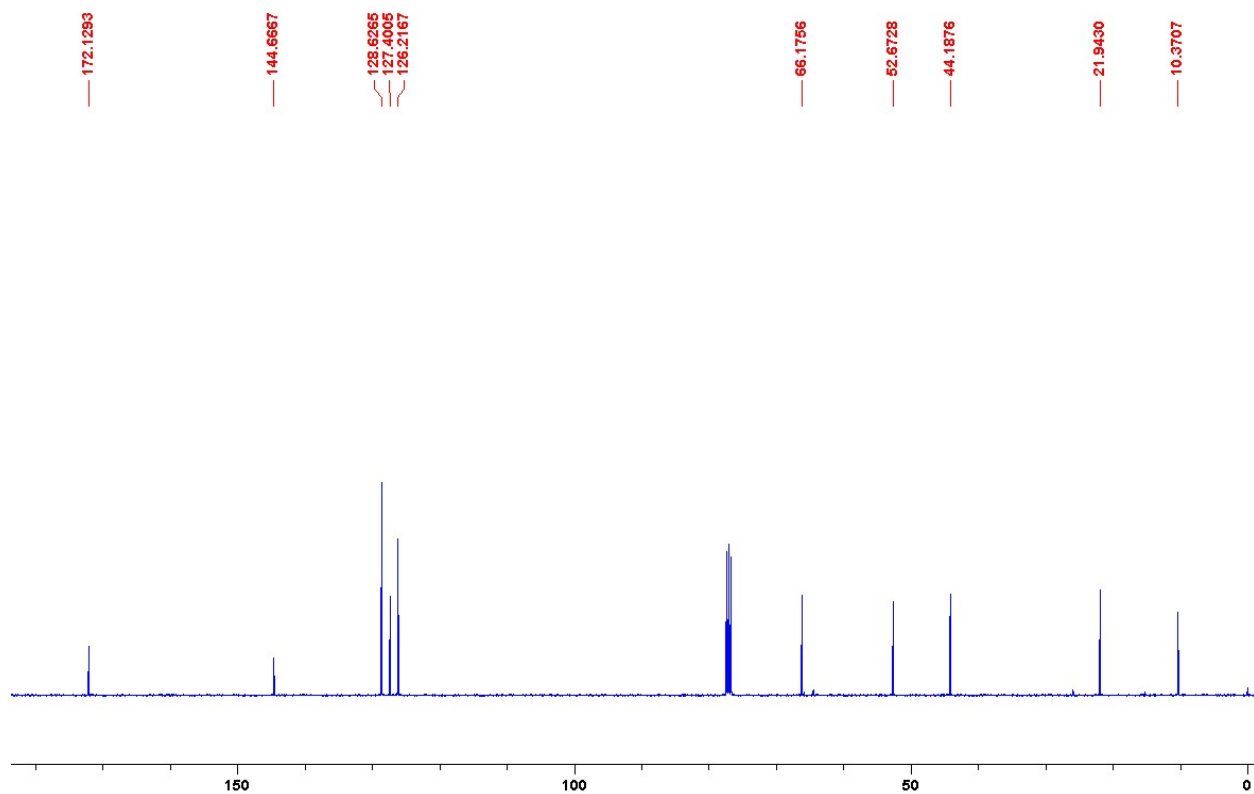

$^{13}\text{C}$  NMR (400 MHz,  $\text{CDCl}_3$ ):  $\delta_{\text{C}}$  10.4 (CH), 21.9 (CH), 44.2 (CH), 52.7 (CH), 66.2 (CH), 126.2 (CH), 127.4 (Cq), 128.6 (CH), 144.7 (Cq), 172.1 (Cq).

**Chiral GC** (*ee* determination):

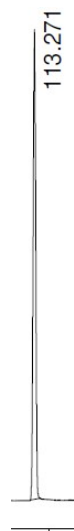

Method (CP-CHIRASIL-DEX CB 25m column):

Start at 85 °C, hold for 20min, heat until 200 °C at a rate of 1.00 °C/min, hold 200°C for 25 min, end.



propyl 3-amino-4'-methylbenzenepropanoate (221.30 g/mol)

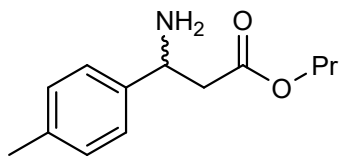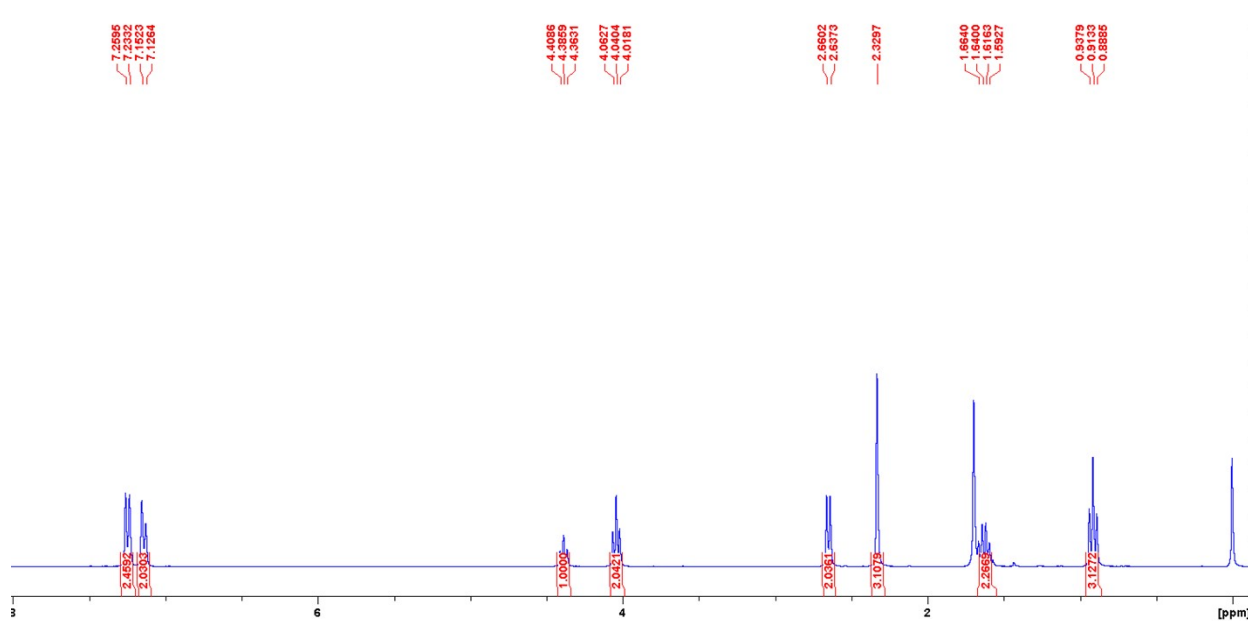

$^1\text{H NMR}$  (300 MHz;  $\text{CDCl}_3$ ):  $\delta_{\text{H}}$  0.91 (3 H, t), 1.55-1.70 (2 H, sext), 2.33 (3 H, s), 2.65 (2 H, d (2 x dd)), 4.04 (2 H, t), 4.39 (1 H, t (dd)), 7.14 (2 H, d), 7.25 (2 H, d).

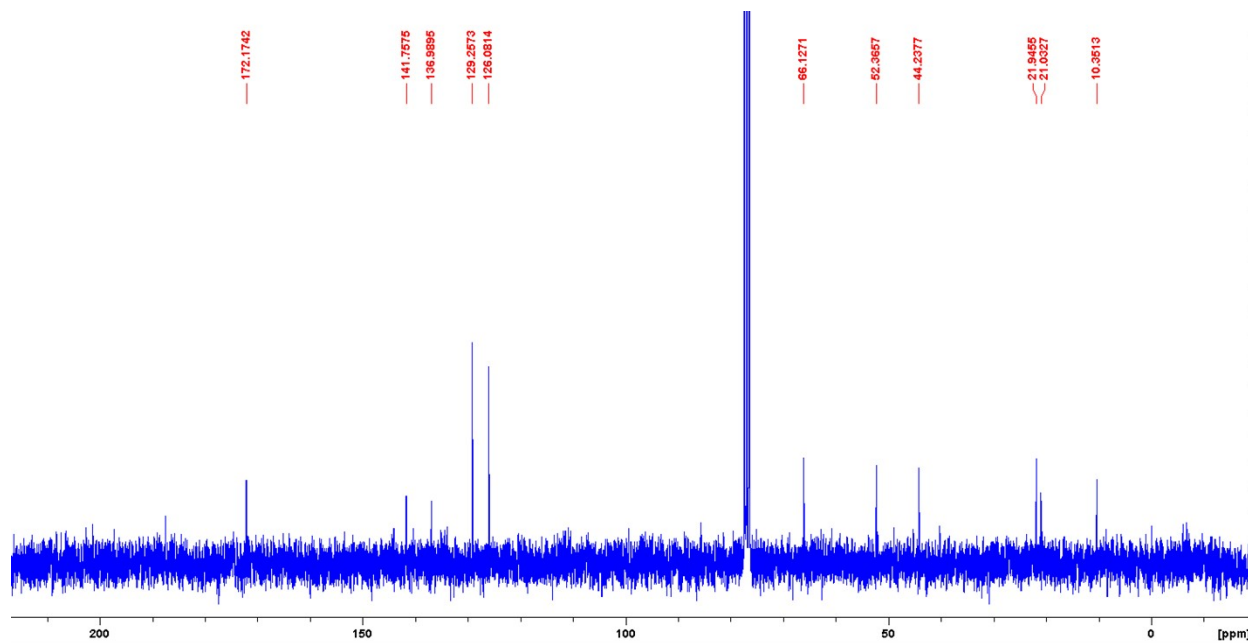

$^{13}\text{C NMR}$  (300 MHz,  $\text{CDCl}_3$ ):  $\delta_{\text{C}}$  10.4 (CH), 21.0 (CH), 21.9 (CH), 44.2 (CH), 52.4 (CH), 66.1 (CH), 126.1 (CH), 129.3 (CH), 137.0 (Cq), 141.8 (Cq), 172.2 (Cq).

**Chiral GC** (*ee* determination):

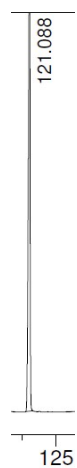

Method (CP-CHIRASIL-DEX CB 25m column):

Start at 85 °C, hold for 20min, heat until 200 °C at a rate of 1.00 °C/min, hold 200°C for 25 min, end.

propyl 3-amino-4'-(trifluoromethyl)benzenepropanoate (275.27 g/mol)

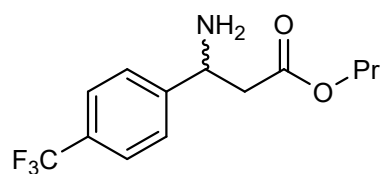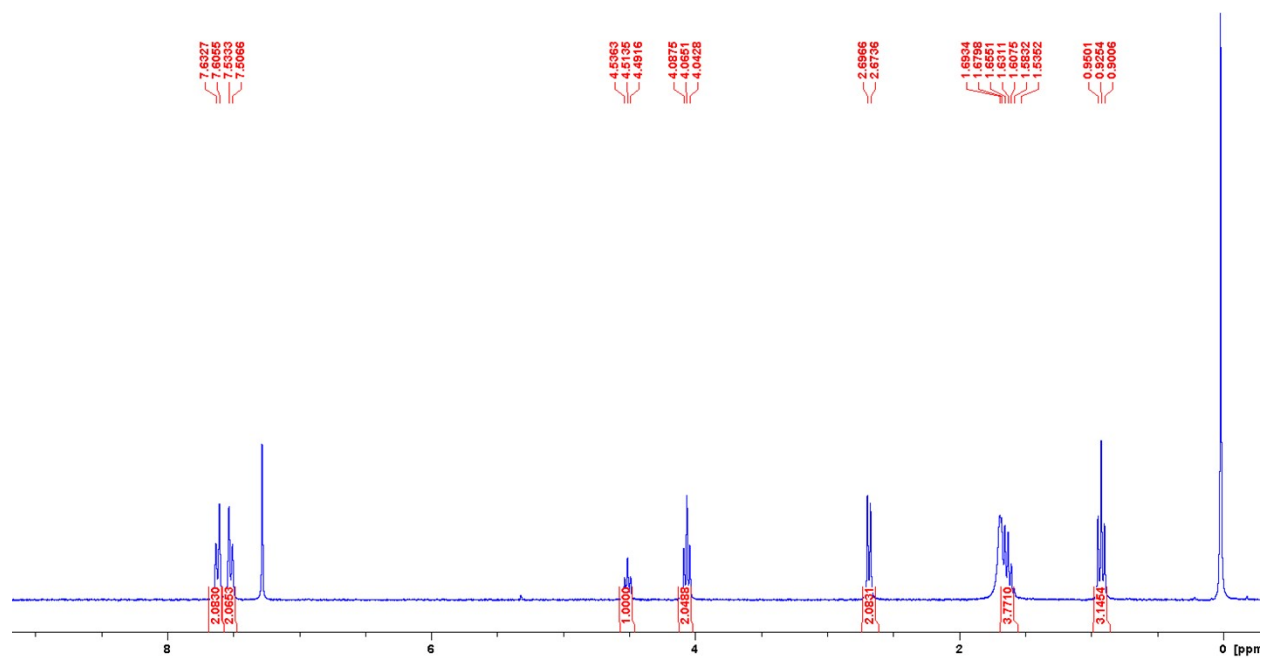

$^1\text{H NMR}$  (300 MHz;  $\text{CDCl}_3$ ):  $\delta_{\text{H}}$  0.92 (3 H, t), 1.56-1.70 (2 H, sext), 2.67 (2 H, d (2 x dd)), 4.04 (2 H, t), 4.48 (1 H, t (dd)), 7.49-7.65 (4 H, m (dd)).

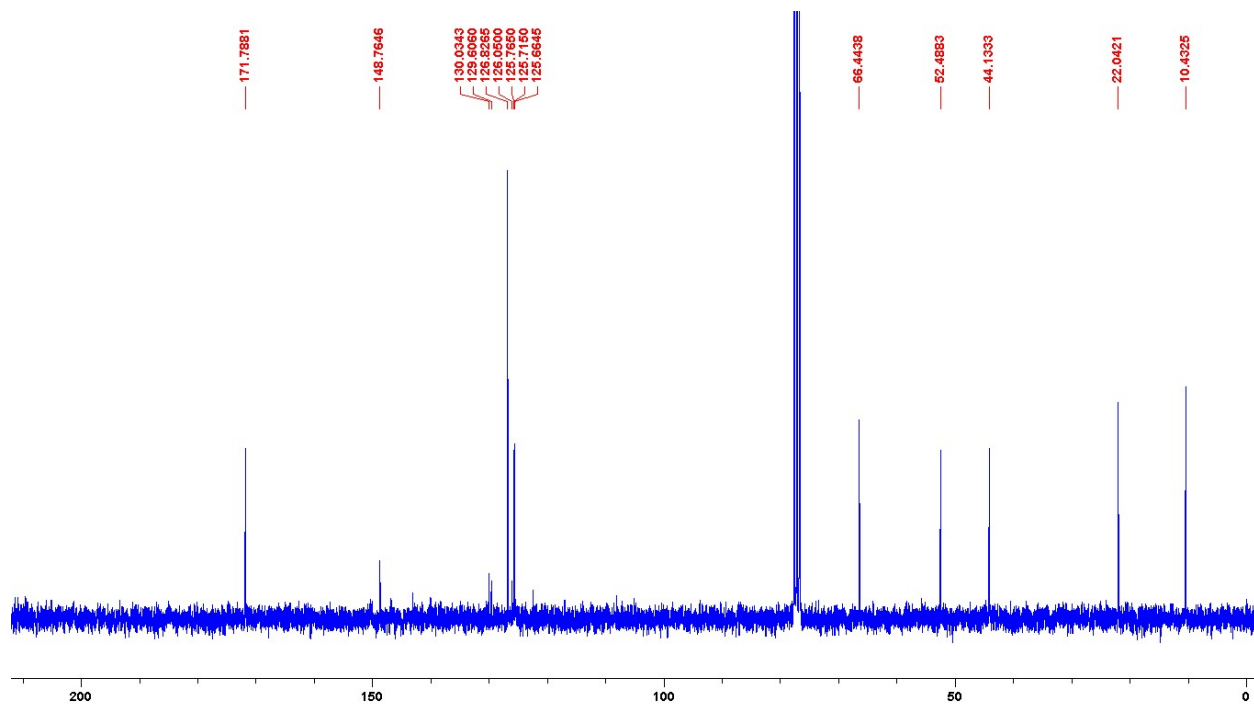

$^{13}\text{C}$  NMR (300 MHz,  $\text{CDCl}_3$ ):  $\delta_{\text{C}}$  10.4 (CH), 22.0 (CH), 44.1 (CH), 52.5 (CH), 66.4 (CH), 125.7 (q,  $\text{CF}_3$ ), 126.8 (CH), 130.0 (Cq), 148.8 (Cq), 171.8 (Cq).

**Chiral GC** (*ee* determination):

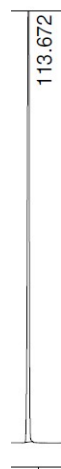

Method (CP-CHIRASIL-DEX CB 25m column):

Start at 85 °C, hold for 20min, heat until 200 °C at a rate of 1.00 °C/min, hold 200°C for 25 min, end.

propyl 3-amino-4'-bromobenzenepropanoate (286.16 g/mol)

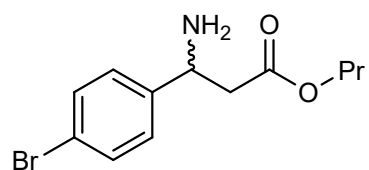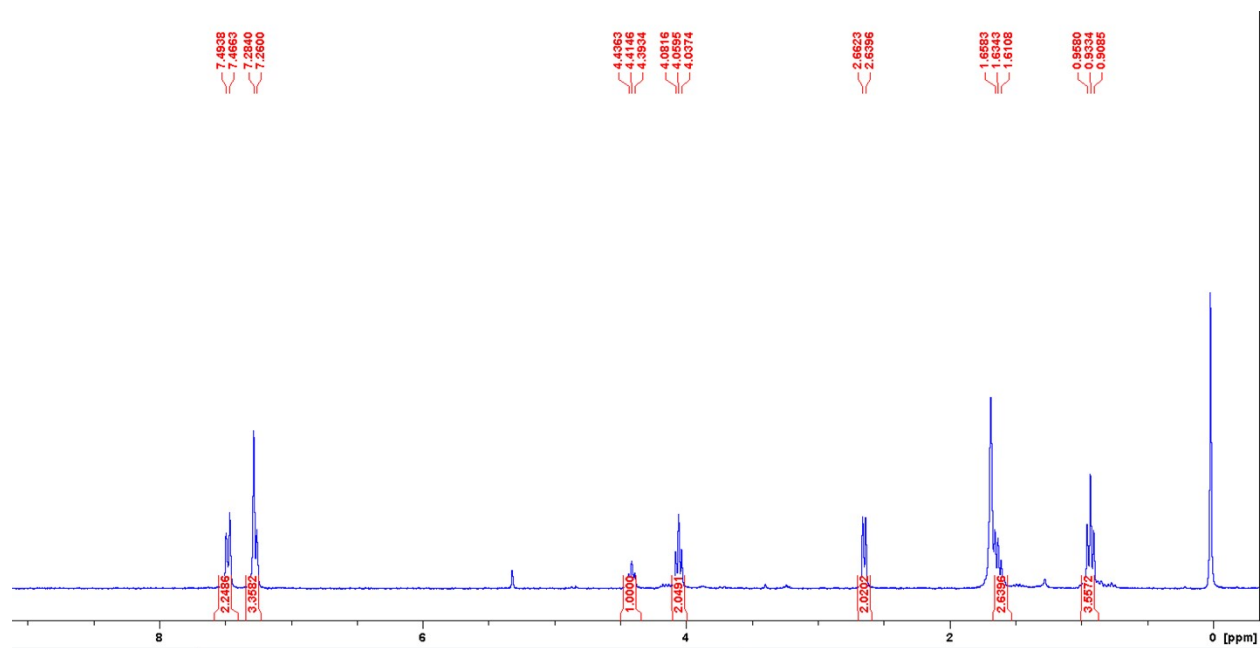

$^1\text{H NMR}$  (300 MHz;  $\text{CDCl}_3$ ):  $\delta_{\text{H}}$  0.91 (3 H, t), 1.55-1.70 (2 H, sext), 2.62 (2 H, d (2 x dd)), 4.04 (2 H, t), 4.39 (1 H, t (dd)), 7.21-7.28 (2 H, m), 7.42-7.49 (2 H, m).

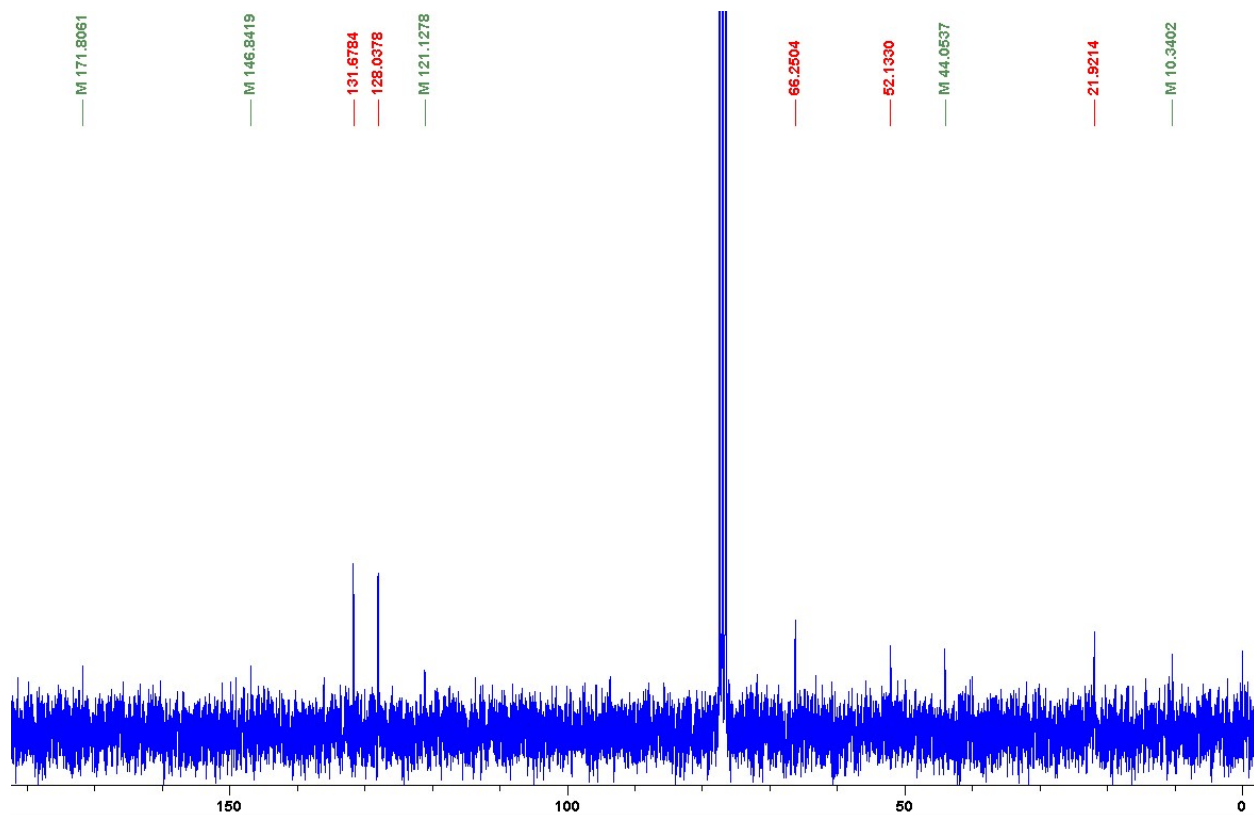

$^{13}\text{C}$  NMR (300 MHz,  $\text{CDCl}_3$ ):  $\delta_{\text{C}}$  10.2 (CH), 21.9 (CH), 44.1 (CH), 52.1 (CH), 66.3 (CH), 121.1 (Cq), 128.0 (CH), 131.7 (CH), 146.8 (Cq), 171.8 (Cq).

**Chiral GC** (*ee* determination):

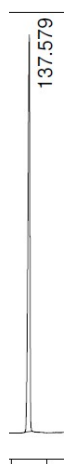

Method (CP-CHIRASIL-DEX CB 25m column):

Start at 85 °C, hold for 20min, heat until 200 °C at a rate of 1.00 °C/min, hold 200°C for 25 min, end.

propyl 3-amino-4'-chlorobenzenepropanoate (241.71 g/mol)

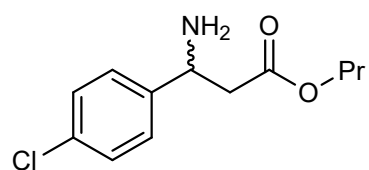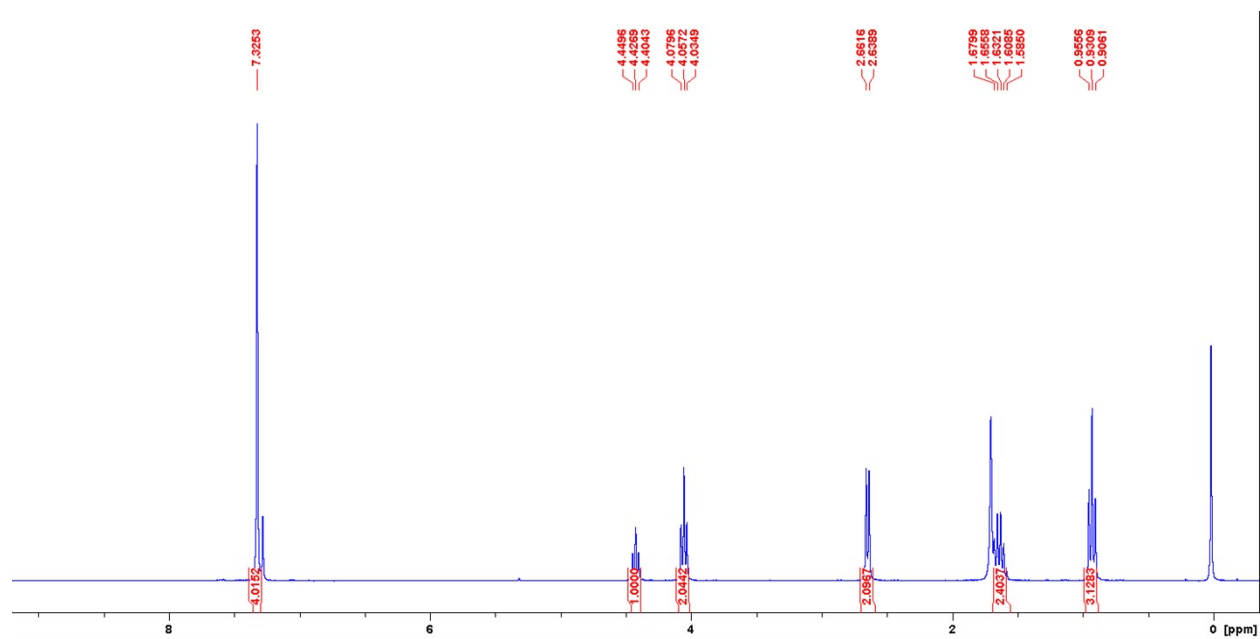

$^1\text{H NMR}$  (300 MHz;  $\text{CDCl}_3$ ):  $\delta_{\text{H}}$  0.91 (3 H, t), 1.55-1.70 (2 H, sext), 2.63 (2 H, d (2 x dd)), 4.04 (2 H, t), 4.41 (1 H, t (dd)), 7.33 (4 H, s).

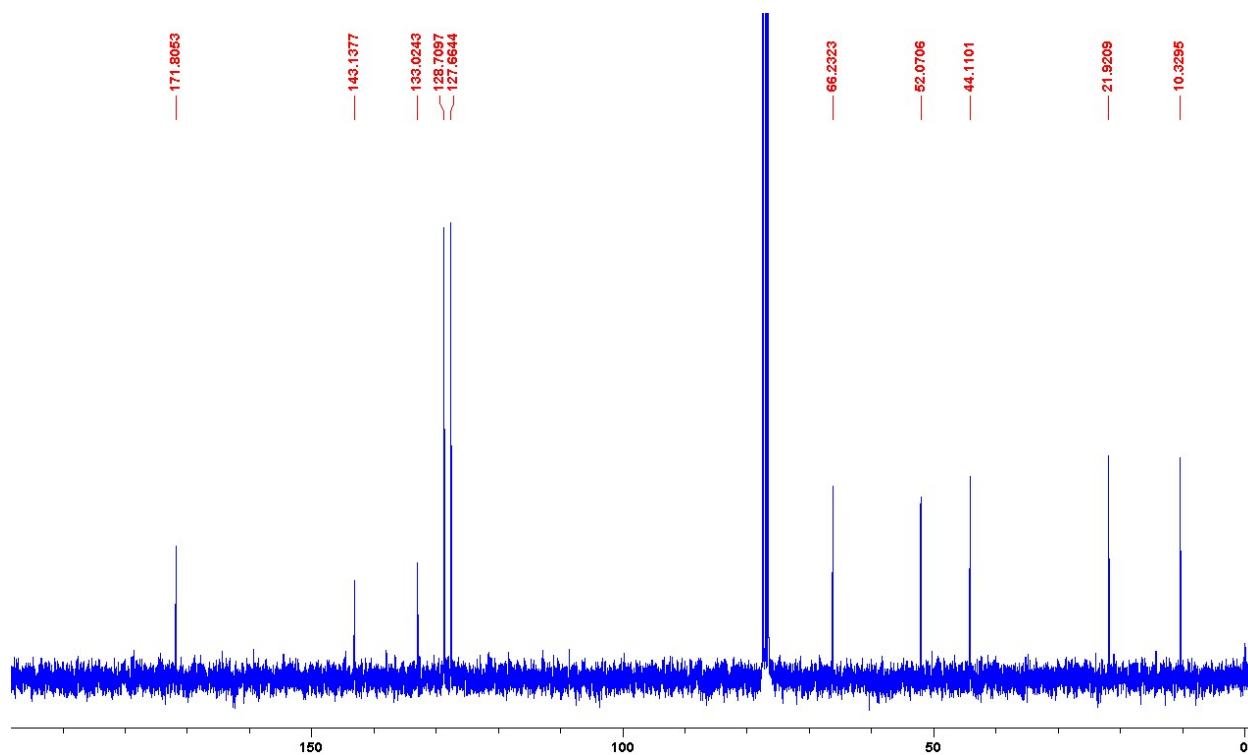

$^{13}\text{C}$  NMR (300 MHz,  $\text{CDCl}_3$ ):  $\delta_{\text{C}}$  10.3 (CH), 21.9 (CH), 44.1 (CH), 52.1 (CH), 66.2 (CH), 127.7 (Cq), 128.7 (CH), 133.0 (CH), 143.1 (Cq), 171.8 (Cq).

**Chiral GC** (*ee* determination):

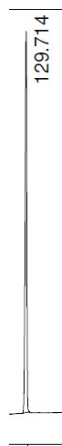

Method (CP-CHIRASIL-DEX CB 25m column):

Start at 85 °C, hold for 20min, heat until 200 °C at a rate of 1.00 °C/min, hold 200°C for 25 min, end.



propyl 3-amino-4'-fluorobenzenepropanoate (225.26 g/mol)

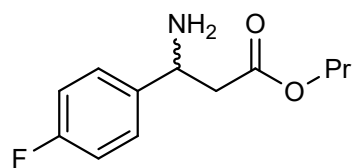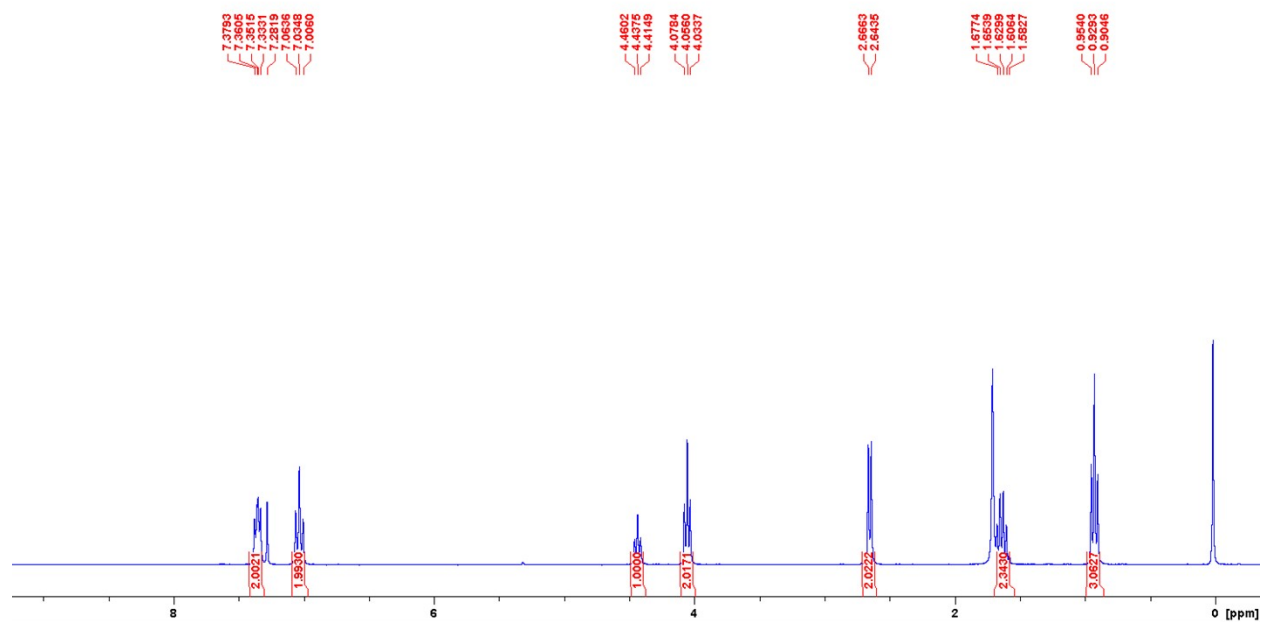

$^1\text{H NMR}$  (300 MHz;  $\text{CDCl}_3$ ):  $\delta_{\text{H}}$  0.92 (3 H, t), 1.57-1.71 (2 H, sext), 2.66 (2 H, d (2 x dd)), 4.05 (2 H, t), 4.44 (1 H, t (dd)), 6.99-7.08 (2 H, m), 7.31-7.40 (2 H, m).

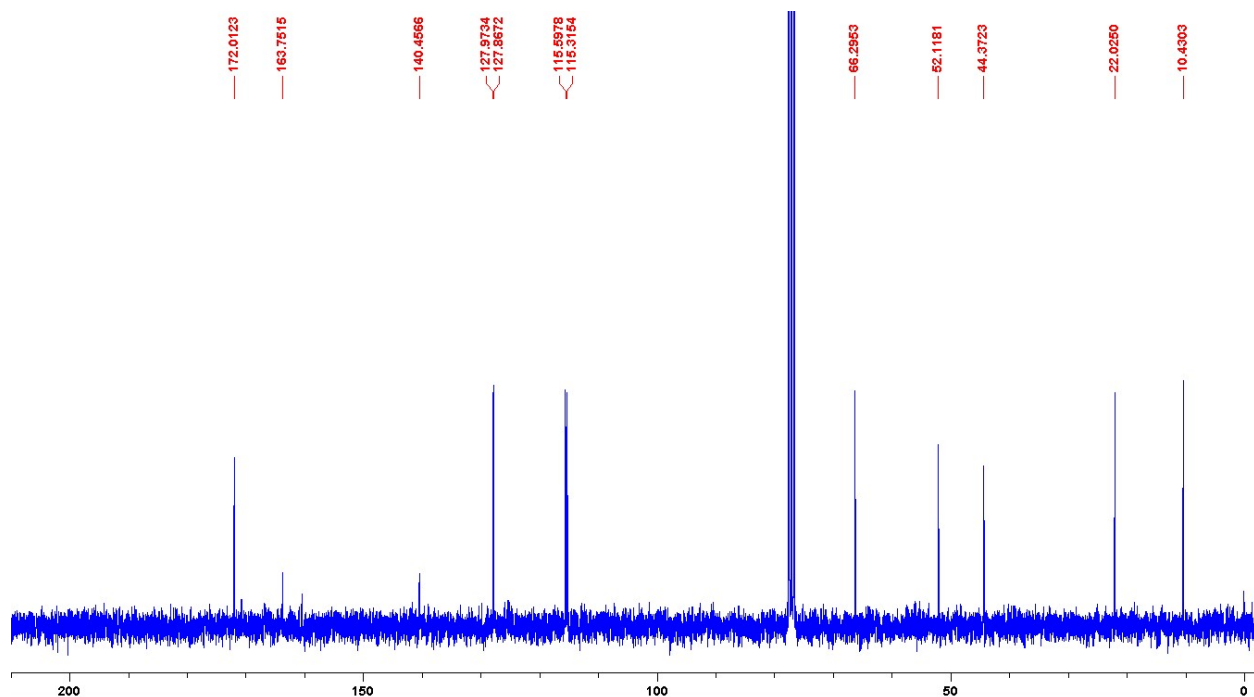

$^{13}\text{C}$  NMR (300 MHz,  $\text{CDCl}_3$ ):  $\delta_{\text{C}}$  10.4 (CH), 22.0 (CH), 44.4 (CH), 52.1 (CH), 66.3 (CH), 115.3 (CH), 115.6 (CH), 127.9 (CH), 128.0 (CH), 140.5 (Cq), 163.8 (Cq), 172.0 (Cq).

**Chiral GC** (*ee* determination):

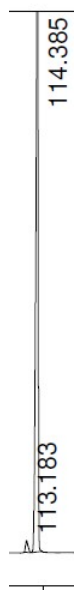

Method (CP-CHIRASIL-DEX CB 25m column):

Start at 85 °C, hold for 20min, heat until 200 °C at a rate of 1.00 °C/min, hold 200°C for 25 min, end.

propyl 3-amino-4'-nitrobenzenepropanoate (252.27 g/mol)

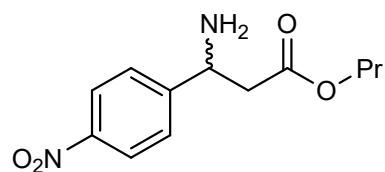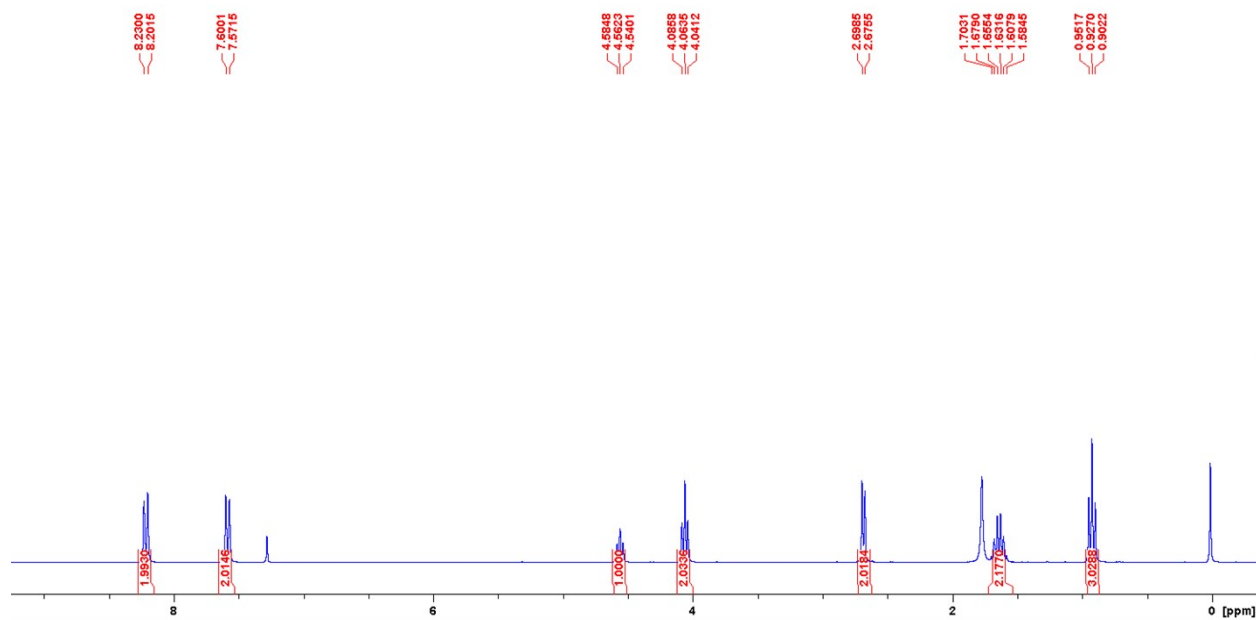

$^1\text{H NMR}$  (300 MHz;  $\text{CDCl}_3$ ):  $\delta_{\text{H}}$  0.91 (3 H, t), 1.54-1.70 (2 H, sext), 2.67 (2 H, d (2 x dd)), 4.05 (2 H, t), 4.55 (1 H, t (dd)), 7.57 (2 H, d), 8.21 (2 H, d).

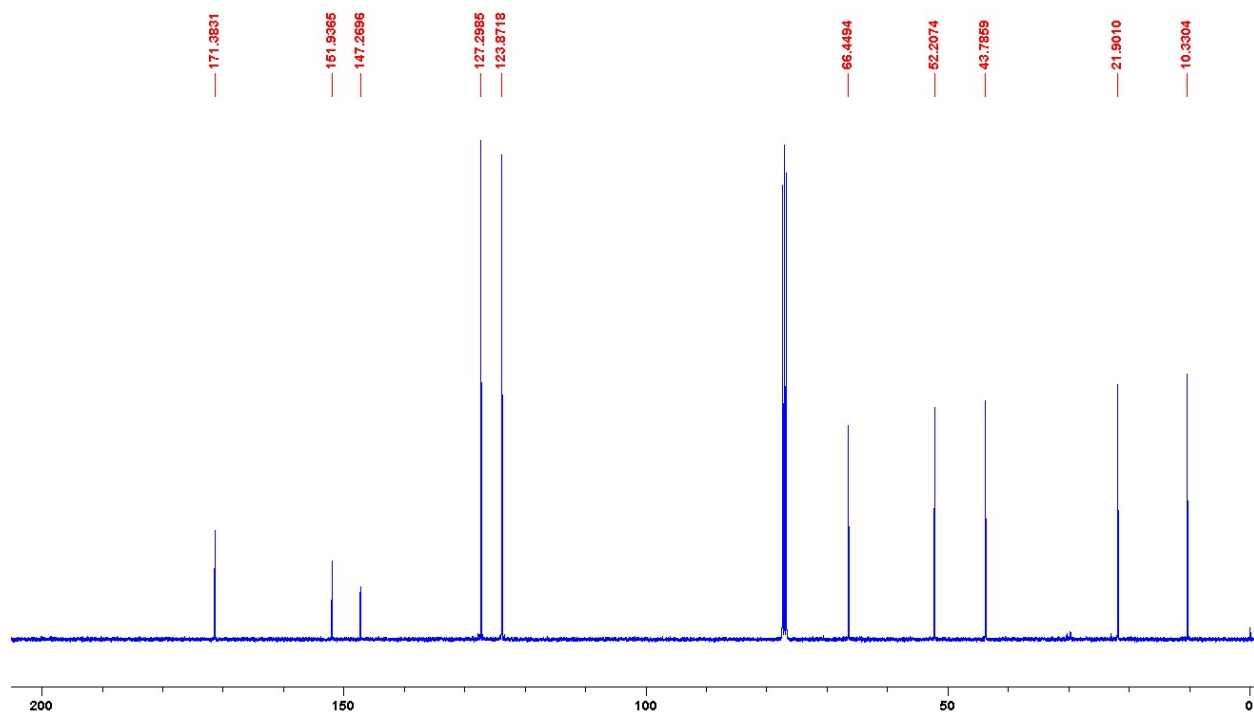

$^{13}\text{C}$  NMR (400 MHz,  $\text{CDCl}_3$ ):  $\delta_{\text{C}}$  10.3 (CH), 21.9 (CH), 43.8 (CH), 52.2 (CH), 66.4 (CH), 123.9 (CH), 127.3 (CH), 147.3 (Cq), 151.9 (Cq), 171.4 (Cq).

**Chiral GC** (*ee* determination):

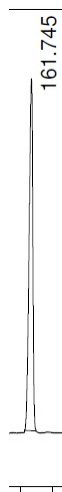

Method (CP-CHIRASIL-DEX CB 25m column):

Start at 85 °C, hold for 20min, heat until 200 °C at a rate of 1.00 °C/min, hold 200°C for 45 min, end.

propyl 3-amino-4'-cyanobenzenepropanoate (232.28 g/mol)

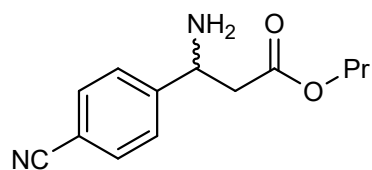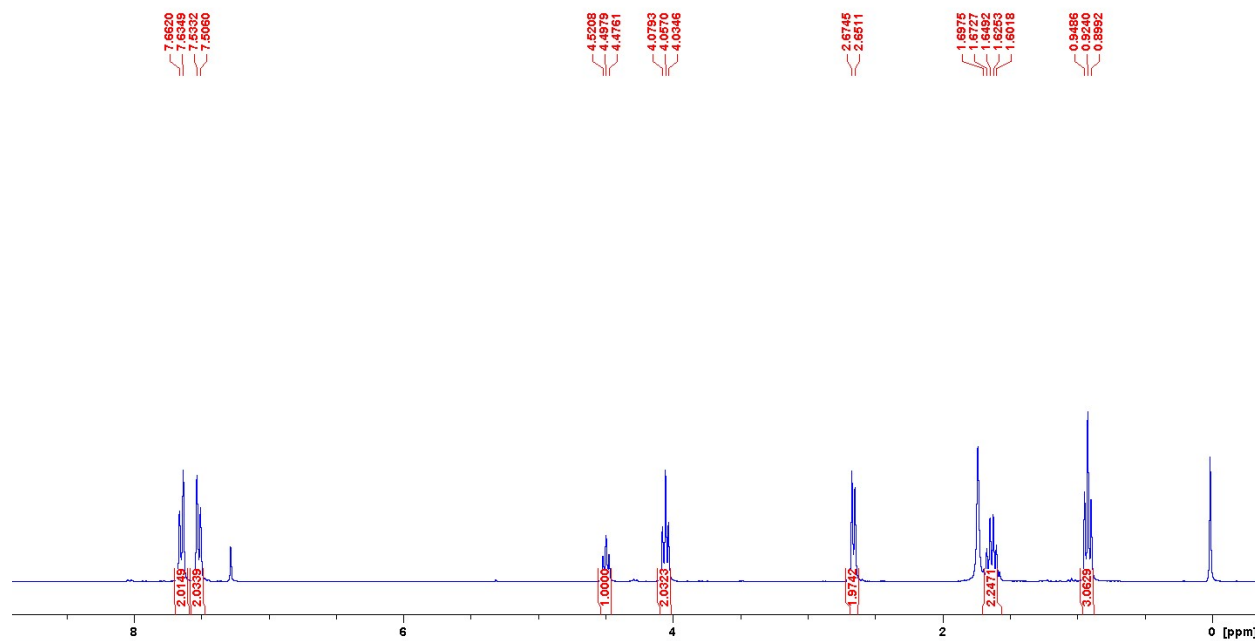

$^1\text{H NMR}$  (300 MHz;  $\text{CDCl}_3$ ):  $\delta_{\text{H}}$  0.91 (3 H, t), 1.55-1.68 (2 H, sext), 2.66 (2 H, d (2 x dd)), 4.02 (2 H, t), 4.48 (1 H, t (dd)), 7.45-7.67 (4 H, m).

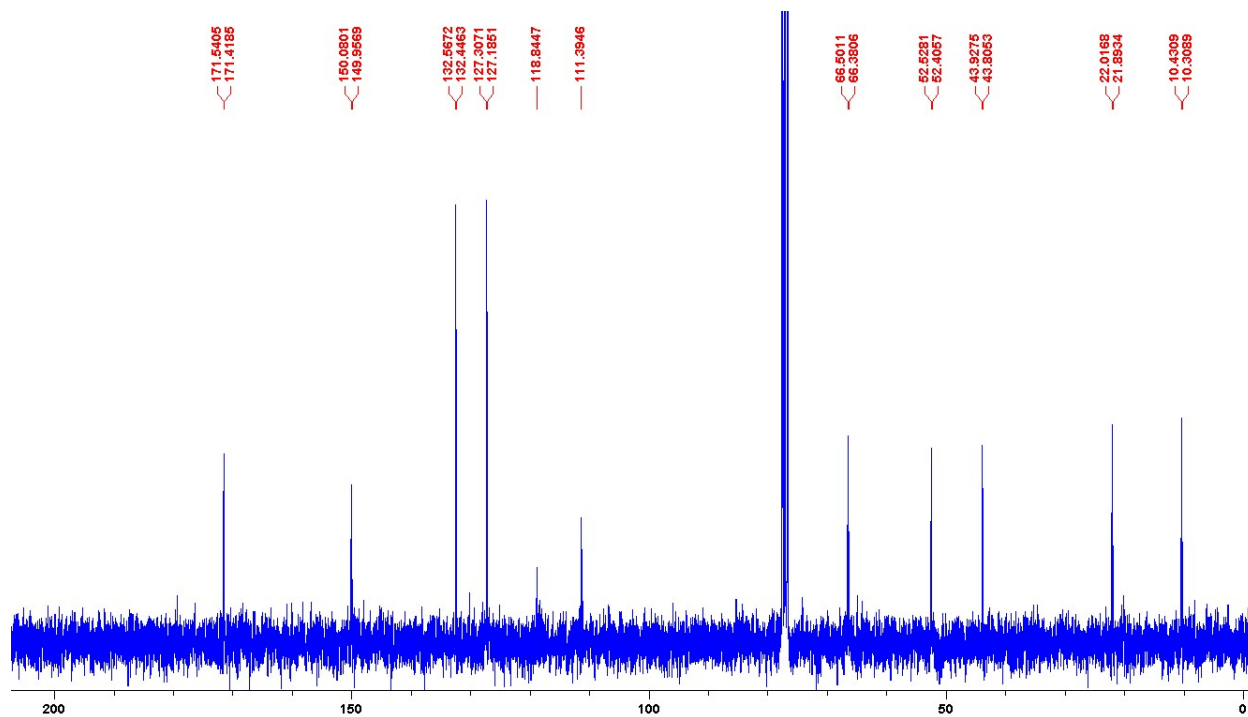

**$^{13}\text{C}$  NMR** (300 MHz,  $\text{CDCl}_3$ ):  $\delta_{\text{C}}$  10.4 (CH), 22.1 (CH), 43.9 (CH), 52.5 (CH), 66.5 (CH), 111,4 (Cq), 118.8 (Cq), 127.3 (CH), 132.6 (CH), 150.1 (Cq), 171.5 (Cq).

**Chiral GC** (*ee* determination):

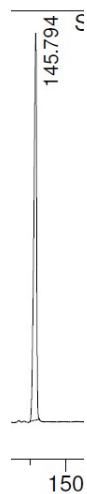

Method (CP-CHIRASIL-DEX CB 25m column):

Start at 85 °C, hold for 20min, heat until 200 °C at a rate of 1.00 °C/min, hold 200°C for 25 min, end.

propyl 3-amino-4'-methoxybenzenepropanoate (237.29 g/mol)

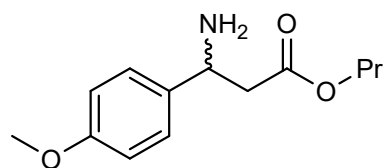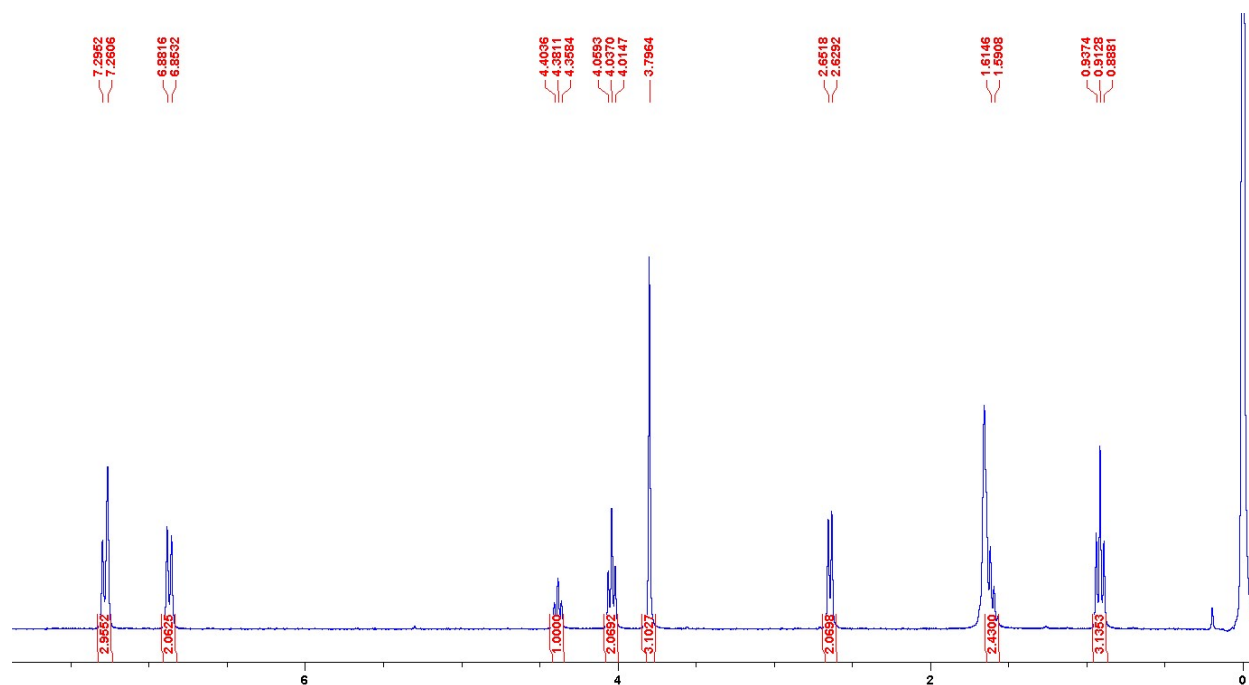

$^1\text{H NMR}$  (300 MHz;  $\text{CDCl}_3$ ):  $\delta_{\text{H}}$  0.91 (3 H, t), 1.56-1.70 (2 H, sext), 2.61-2.67 (2 H, d (2 x dd)), 3.80 (3 H, s), 4.04 (2 H, t), 4.38 (1 H, t (dd)), 6.87 (2 H, d), 7.28 (2 H, d).

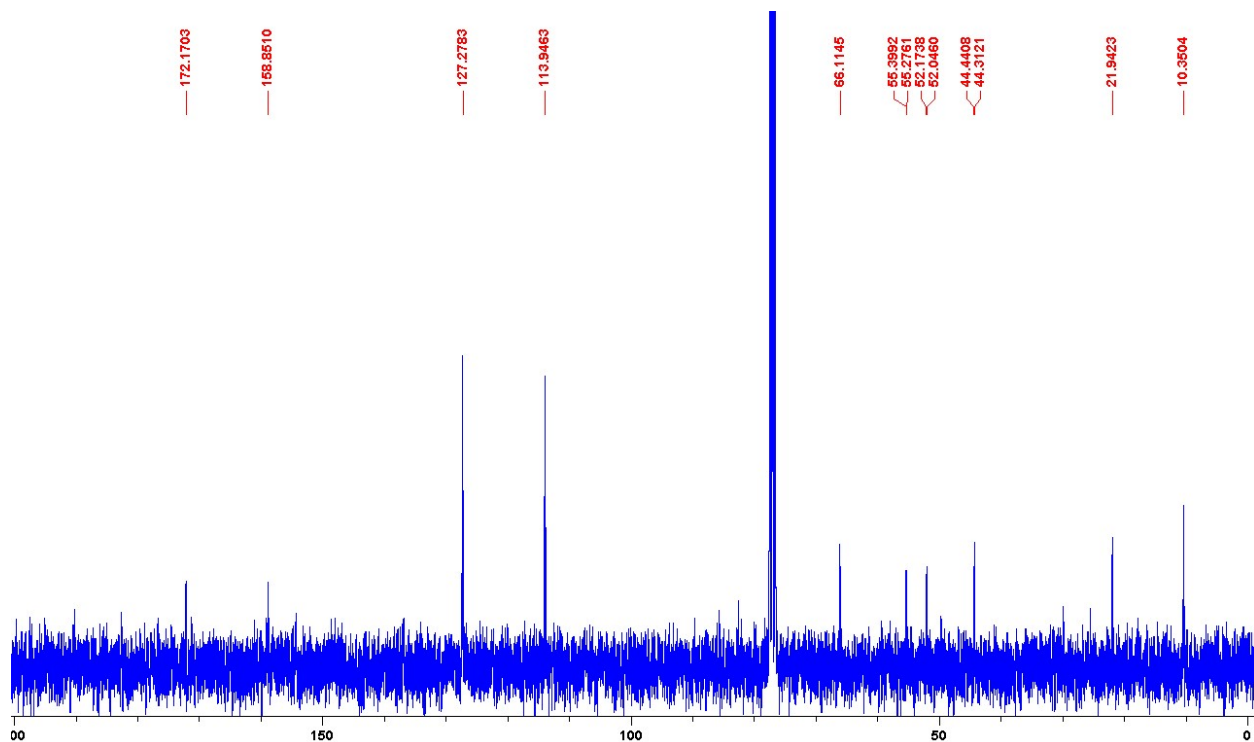

$^{13}\text{C}$  NMR (300 MHz,  $\text{CDCl}_3$ ):  $\delta_{\text{C}}$  10.4 (CH), 21.9 (CH), 44.4 (CH), 52.1 (CH), 55.3 (CH), 66.1 (CH), 113.9 (CH), 127.3 (CH), 137.0 (Cq), 158.9 (Cq), 172.2 (Cq).

Chiral GC (*ee* determination):

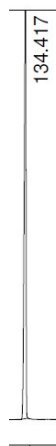

Method (CP-CHIRASIL-DEX CB 25m column):

Start at 85 °C, hold for 20min, heat until 200 °C at a rate of 1.00 °C/min, hold 200°C for 25 min, end.



propyl 3-amino-3',4'-dimethoxybenzenepropanoate (267.32 g/mol)

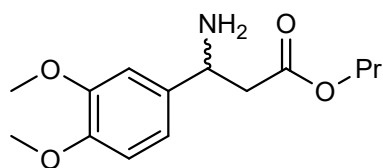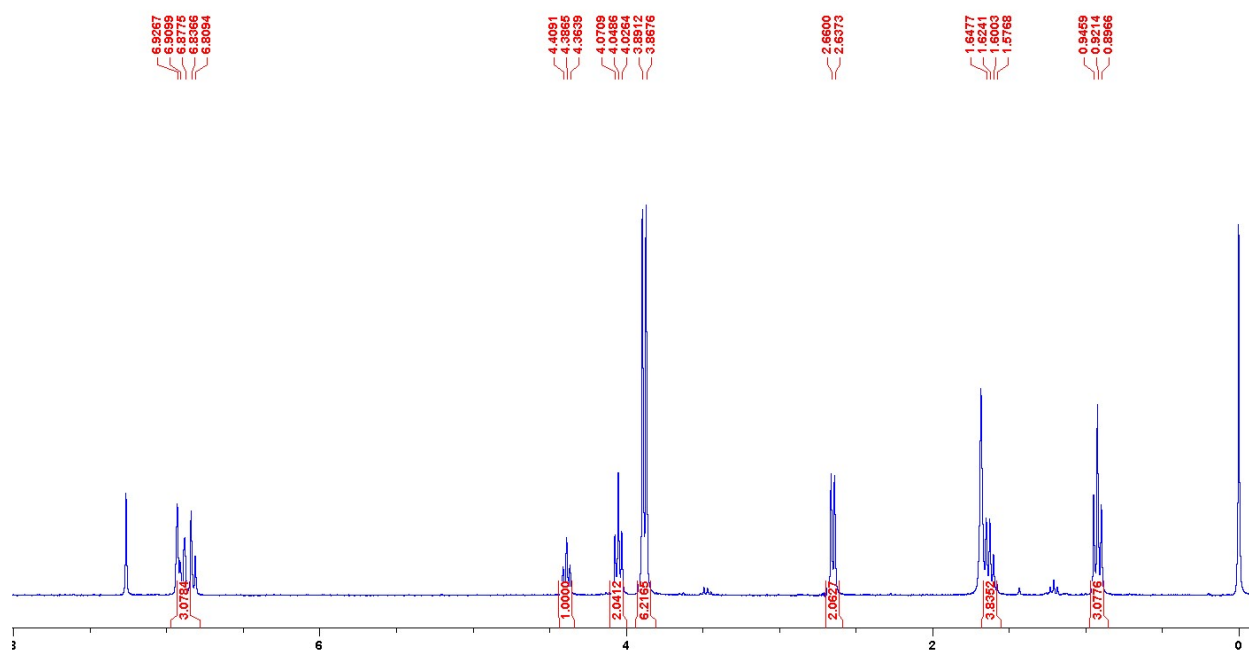

$^1\text{H NMR}$  (300 MHz;  $\text{CDCl}_3$ ):  $\delta_{\text{H}}$  0.92 (3 H, t), 1.56-1.69 (2 H, sext), 2.65 (2 H, d (2 x dd)), 3.87 (3 H, s), 3.89 (3 H, s), 4.04 (2 H, t), 4.39 (1 H, t (dd)), 6.78-6.95 (3 H, m).

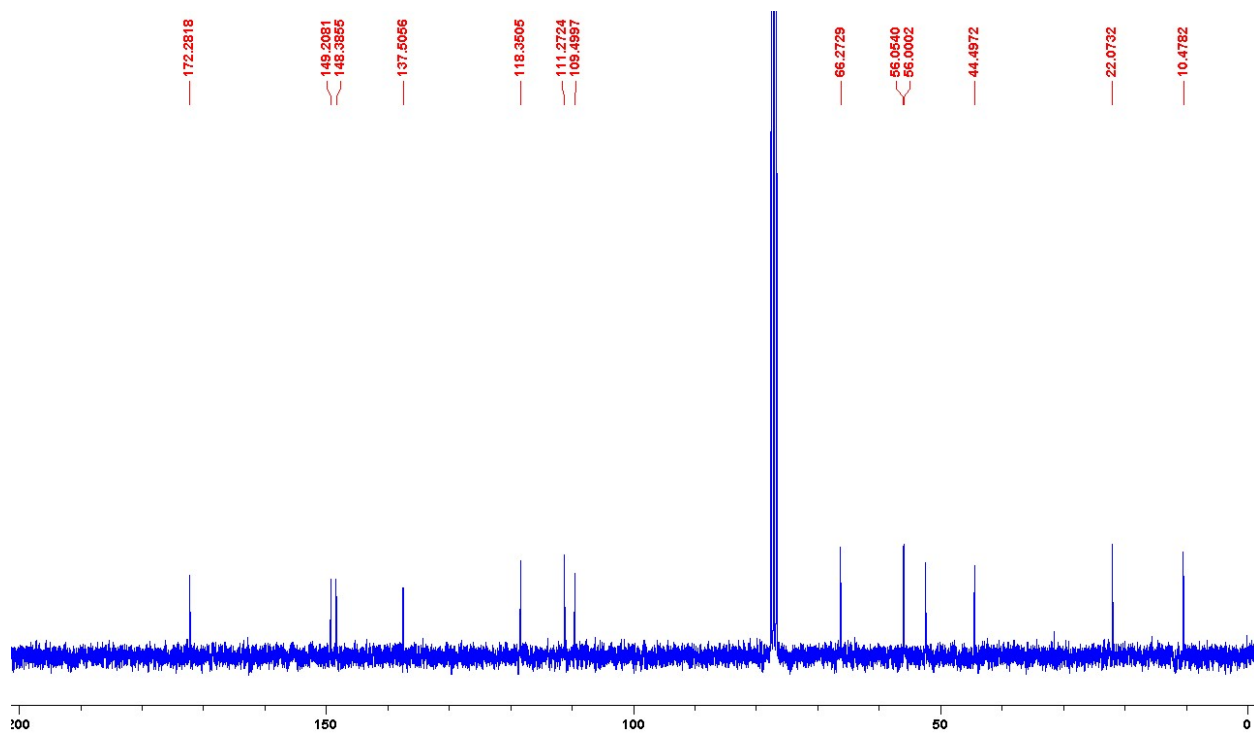

**<sup>13</sup>C NMR** (300 MHz, CDCl<sub>3</sub>): δ<sub>C</sub> 10.4 (CH), 22.1 (CH), 44.5 (CH), 52.5 (CH), 56.0 (CH), 56.1 (CH), 66.3 (CH), 109.5 (CH), 111.3 (CH), 118.4 (CH), 137.5 (Cq), 148.4 (Cq), 149.2 (Cq), 172.3 (Cq).

**Chiral GC** (*ee* determination):

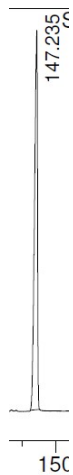

Method (CP-CHIRASIL-DEX CB 25m column):

Start at 85 °C, hold for 20min, heat until 200 °C at a rate of 1.00 °C/min, hold 200°C for 25 min, end.

propyl 3-amino-3-cyclohexanepropanoate (213.24 g/mol)

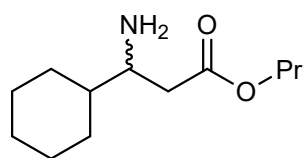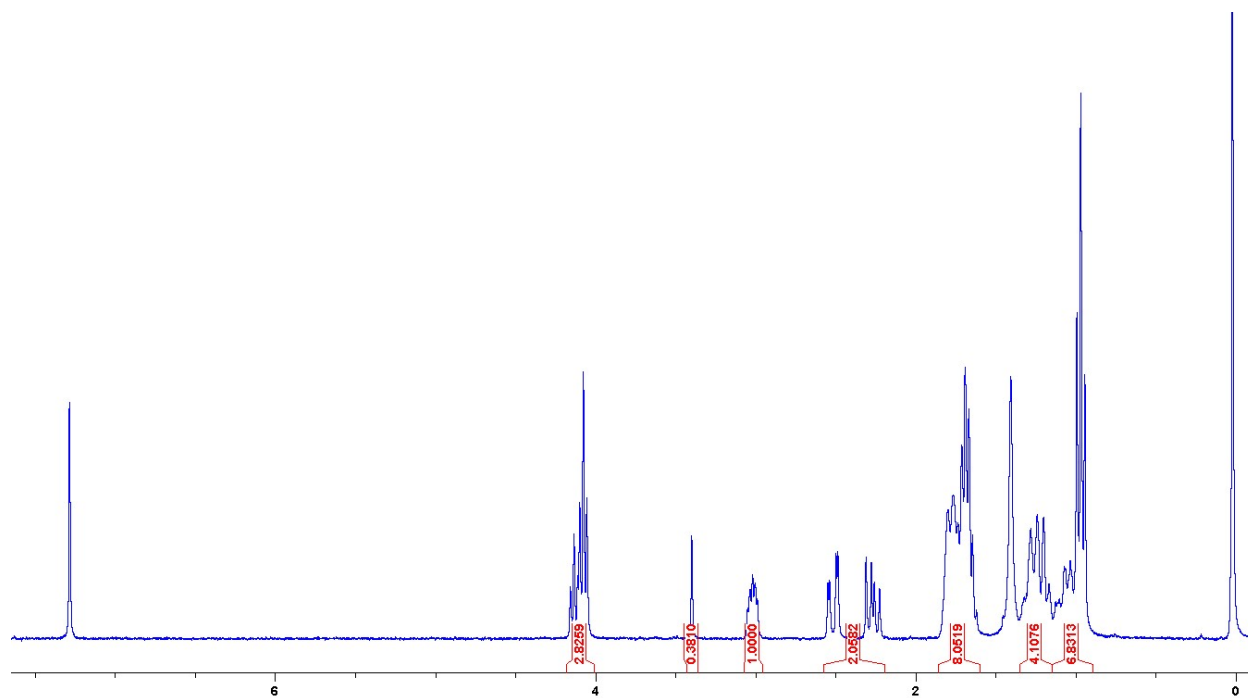

$^1\text{H NMR}$  (300 MHz;  $\text{CDCl}_3$ ):  $\delta_{\text{H}}$  0.89-1.11 (6 H, m), 1.11-1.33 (4 H, m), 1.58-1.83 (8 H, m), 2.18-2.56 (2 H, m (2 x dd)), 2.95-3.04 (1 H, m (dd)), 4.06 (2 H, t).

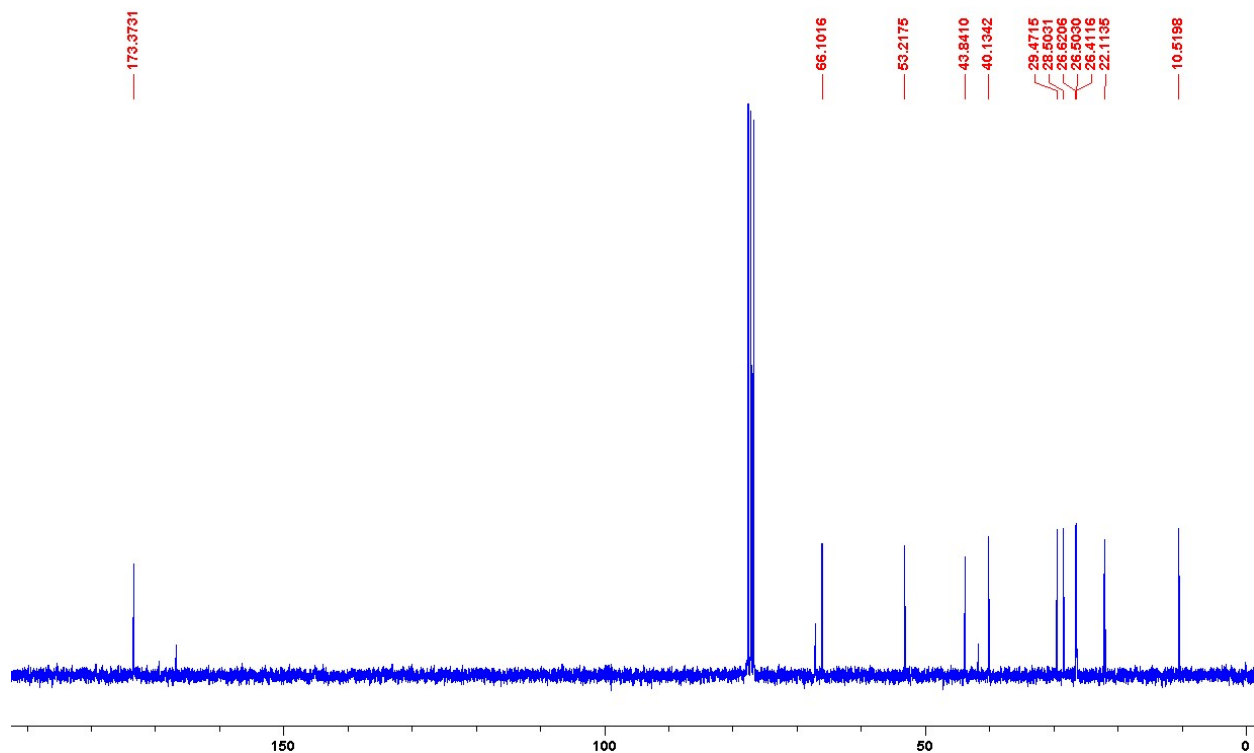

$^{13}\text{C}$  NMR (300 MHz,  $\text{CDCl}_3$ ):  $\delta_{\text{C}}$  10.5 (CH), 22.1 (CH), 26.4 (CH), 26.5 (CH), 26.6 (CH), 28.5 (CH), 29.5 (CH), 40.1 (Cq), 43.8 (CH), 53.2 (CH), 66.1 (CH), 173.4 (Cq).

**Chiral GC** (*ee* determination):

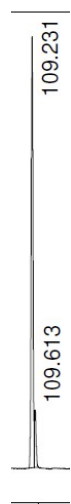

Method (CP-CHIRASIL-DEX CB 25m column):

Start at 85 °C, hold for 20min, heat until 200 °C at a rate of 1.00 °C/min, hold 200°C for 25 min, end.

propyl 3-amino-4-methylpentanoate (173.25 g/mol)

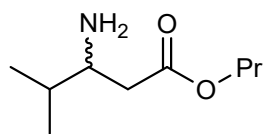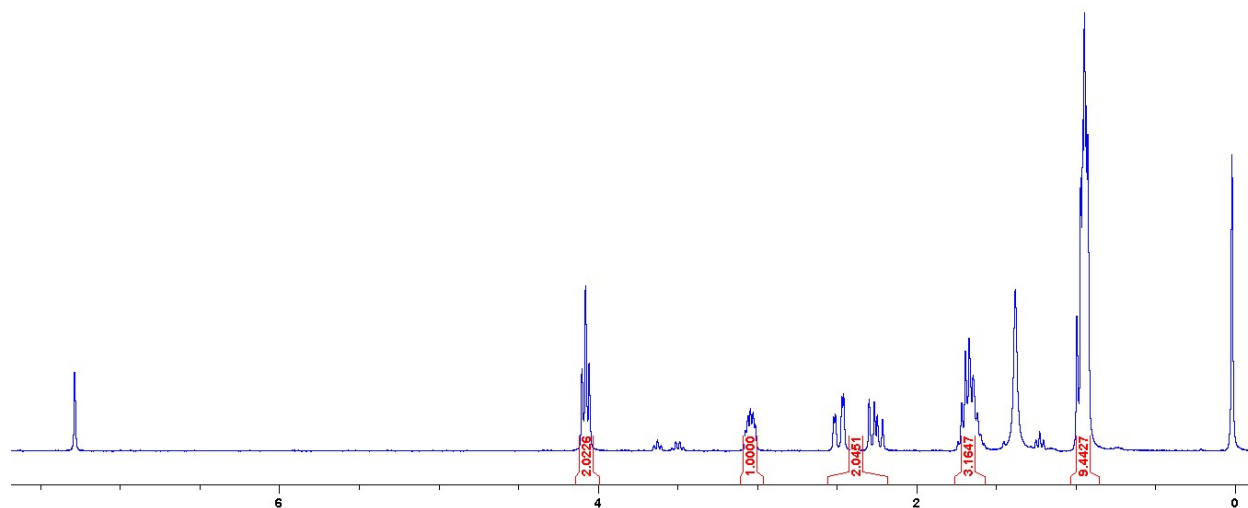

$^1\text{H NMR}$  (300 MHz;  $\text{CDCl}_3$ ):  $\delta_{\text{H}}$  0.84-1.00 (9 H, m), 1.55-1.74 (3 H, m), 2.17-2.53 (2 H, m (2 x dd)), 2.97-3.07 (1 H, m (dd)), 4.06 (2 H, t).

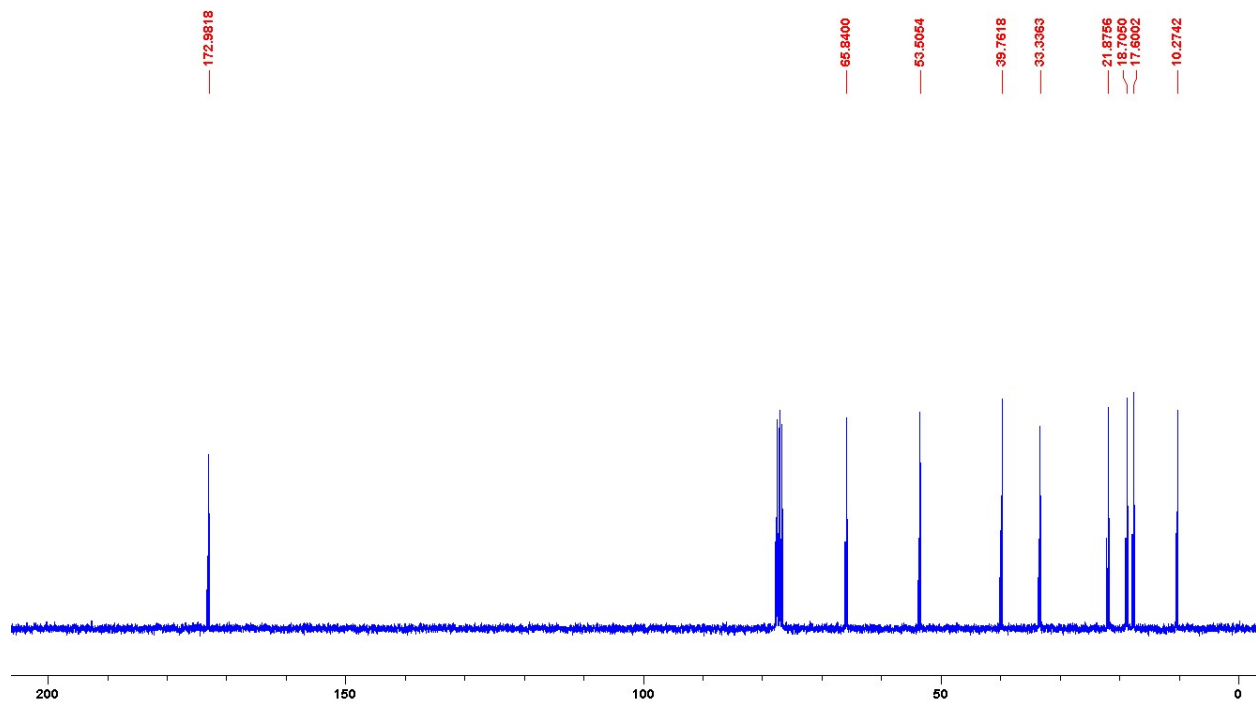

**$^{13}\text{C}$  NMR** (300 MHz,  $\text{CDCl}_3$ ):  $\delta_{\text{C}}$  10.3 (CH), 17.6 (CH), 18.7 (CH), 21.9 (CH), 33.3 (CH), 39.8 (CH), 53.5 (CH), 65.8 (CH), 173.0 (Cq).

**Chiral GC** (*ee* determination):

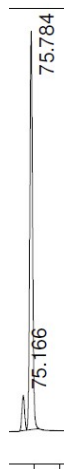

Method (CP-CHIRASIL-DEX CB 25m column):

Start at 85 °C, hold for 20min, heat until 200 °C at a rate of 1.00 °C/min, hold 200°C for 25 min, end.

propyl 3-amino-3-anthracenepropanoate (257.33 g/mol)

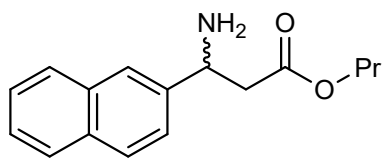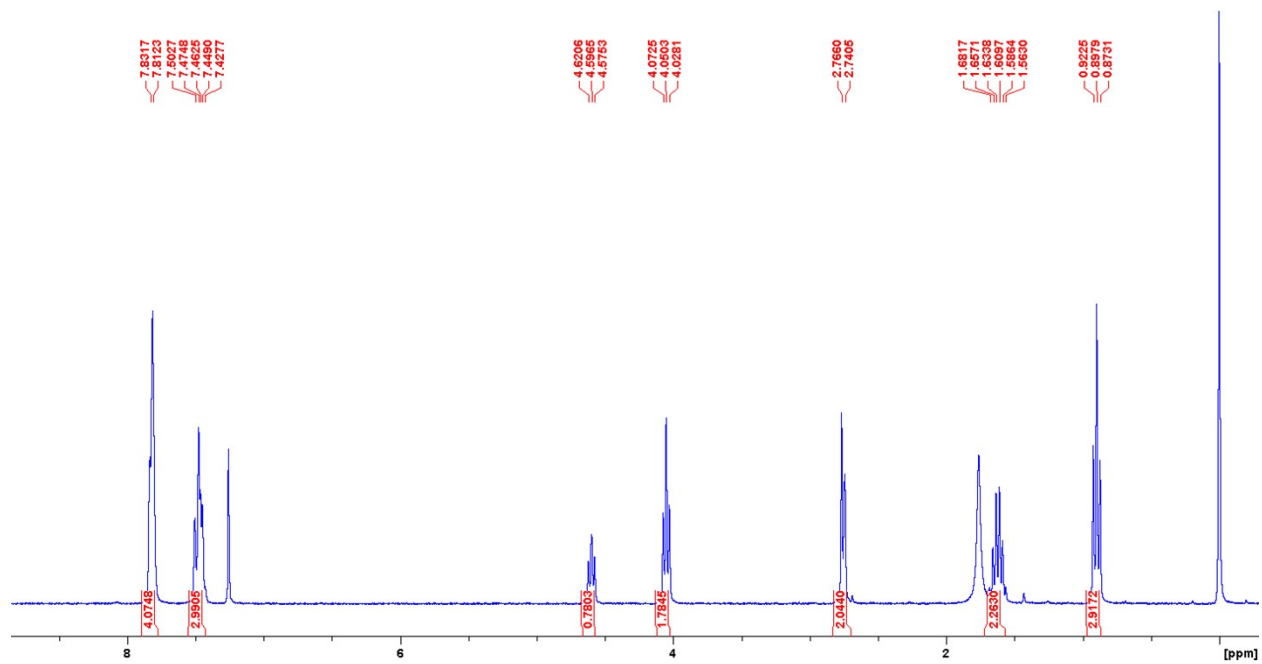

$^1\text{H NMR}$  (300 MHz;  $\text{CDCl}_3$ ):  $\delta_{\text{H}}$  0.90 (3 H, t), 1.55-1.70 (2 H, sext), 2.75 (2 H, d (2 x dd)), 4.05 (2 H, t), 4.60 (1 H, t (dd)), 7.40-7.53 (3 H, m), 7.77-7.87 (4 H, m).

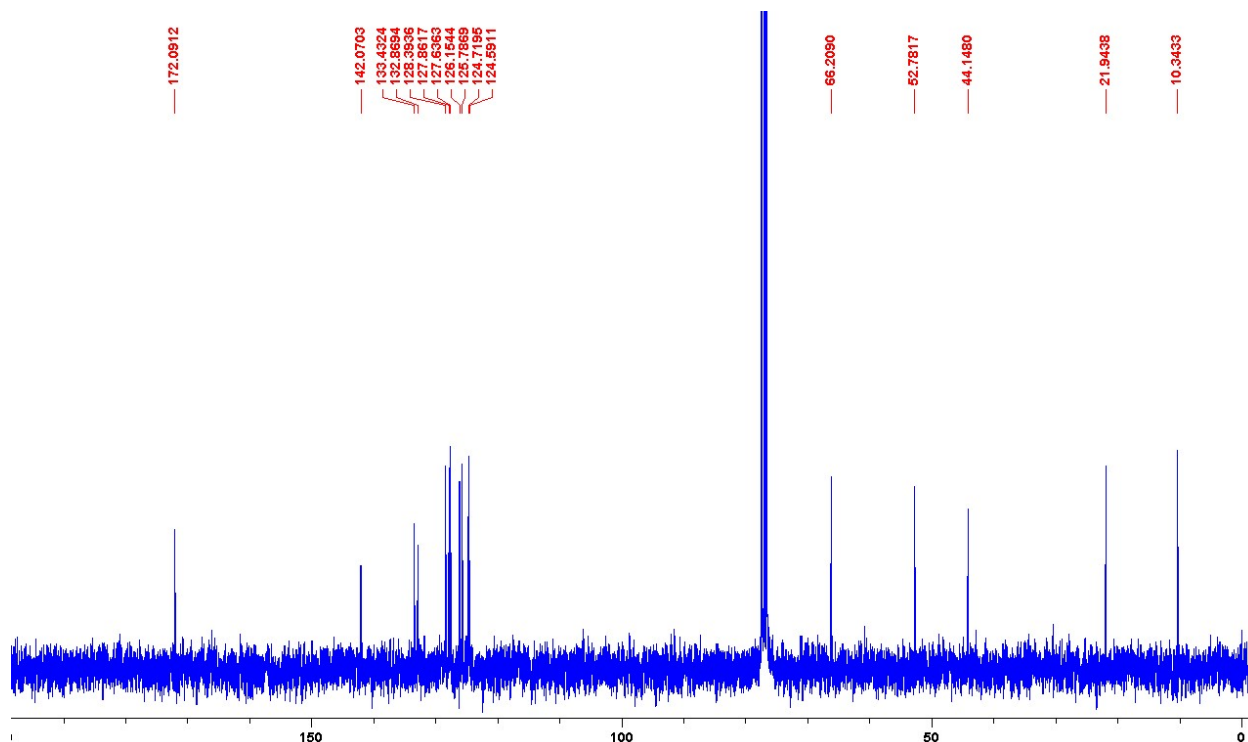

$^{13}\text{C}$  NMR (300 MHz,  $\text{CDCl}_3$ ):  $\delta_{\text{C}}$  10.3 (CH), 21.9 (CH), 44.1 (CH), 52.8 (CH), 66.2 (CH), 124.6 (CH), 124.7 (CH), 125.8 (CH), 126.2 (CH), 127.6 (CH), 127.9 (CH), 128.4 (CH), 132.9 (Cq), 133.4 (Cq), 142.1 (Cq), 172.1 (Cq).

**Chiral GC** (*ee* determination):

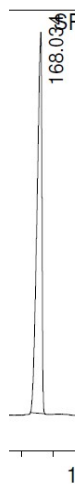

Method (CP-CHIRASIL-DEX CB 25m column):

Start at 85 °C, hold for 20min, heat until 200 °C at a rate of 1.00 °C/min, hold 200°C for 45 min, end.



propyl 3-amino-2'-thiophenepropanoate (213.30 g/mol)

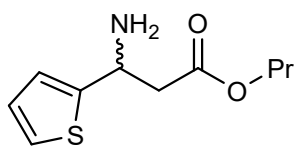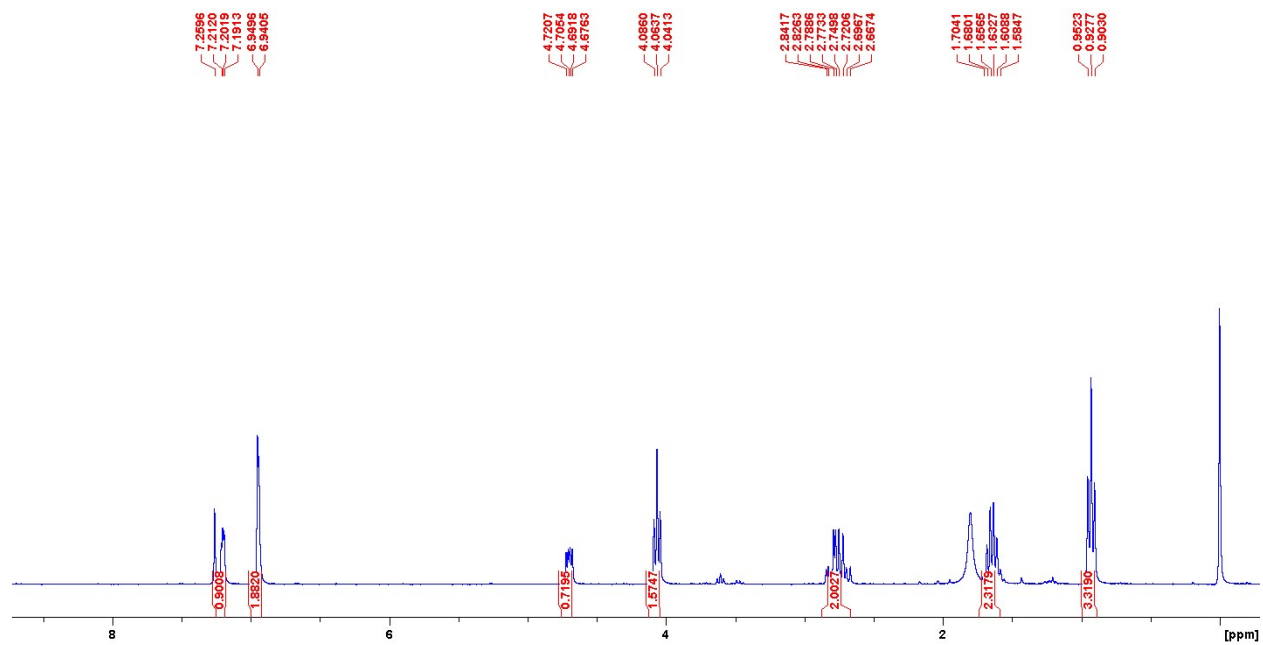

$^1\text{H NMR}$  (300 MHz;  $\text{CDCl}_3$ ):  $\delta_{\text{H}}$  0.93 (3 H, t), 1.54-1.72 (2 H, sext), 2.65-2.87 (2 H, m (2 x dd)), 4.06 (2 H, t), 4.65-4.74 (1 H, m (dd)), 6.90-6.98 (2 H, m), 7.17-7.23 (1 H, m).

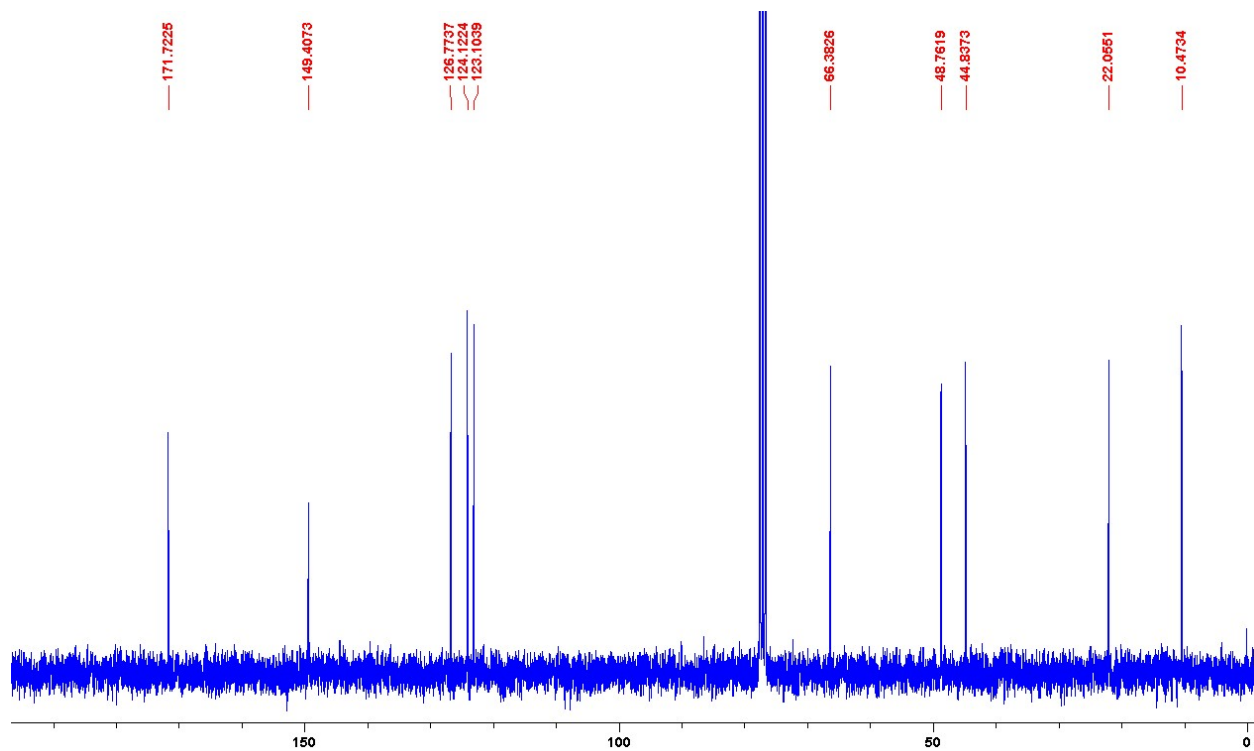

$^{13}\text{C}$  NMR (300 MHz,  $\text{CDCl}_3$ ):  $\delta_{\text{C}}$  10.5 (CH), 22.1 (CH), 44.8 (CH), 48.8 (CH), 66.4 (CH), 123.1 (CH), 124.1 (CH), 126.8 (CH), 149.4 (Cq), 171.7 (Cq).

**Chiral GC** (*ee* determination):

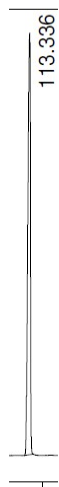

Method (CP-CHIRASIL-DEX CB 25m column):

Start at 85 °C, hold for 20min, heat until 200 °C at a rate of 1.00 °C/min, hold 200°C for 45 min, end.

propyl 3-amino-2'-furanpropanoate (197.23 g/mol)

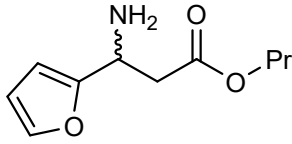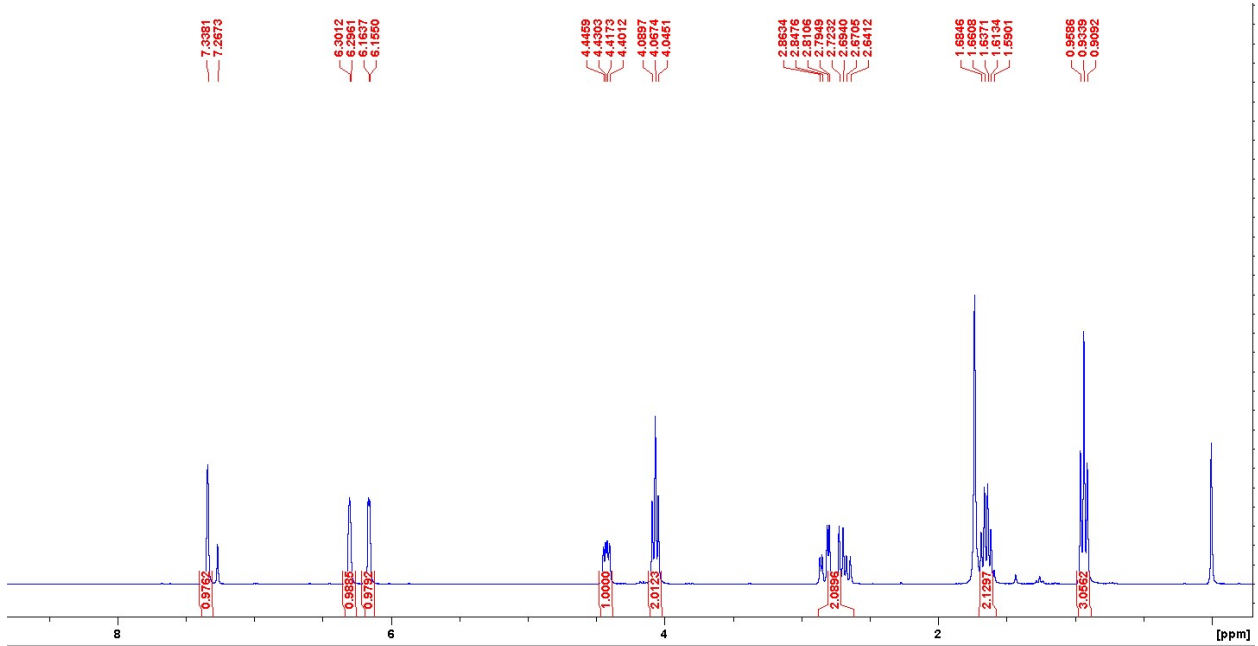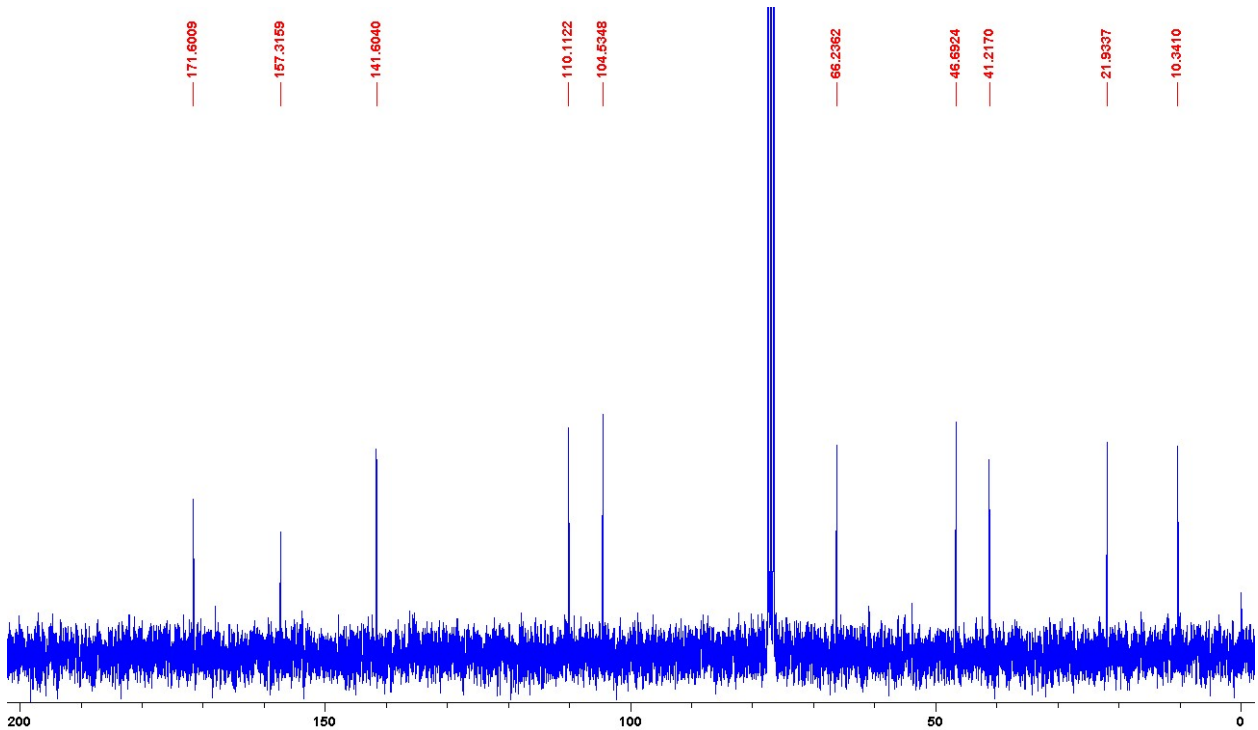

**$^{13}\text{C}$  NMR** (300 MHz,  $\text{CDCl}_3$ ):  $\delta_{\text{C}}$  10.3 (CH), 21.9 (CH), 41.2 (CH), 46.7 (CH), 66.2 (CH), 104.5 (CH), 110.1 (CH), 141.6 (CH), 157.3 (Cq), 171.6 (Cq).

**Chiral GC** (*ee* determination):

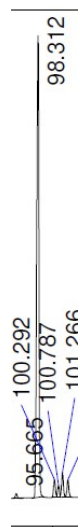

Method (CP-CHIRASIL-DEX CB 25m column):

Start at 85 °C, hold for 20min, heat until 200 °C at a rate of 1.00 °C/min, hold 200°C for 45 min, end.
